# 1 Ageing impairs the neuro-vascular interface in the heart

2 Julian U. G. Wagner<sup>1,2,3</sup>, Lukas Tombor<sup>1,3</sup>, Pedro Felipe Malacarne<sup>4</sup>, Lisa-Maria  
3 Kettenhausen<sup>1</sup>, Josefine Panthel<sup>1</sup>, Maria Cipca<sup>1</sup>, Kathrin A. Stilz<sup>1</sup>, Ariane Fischer<sup>1</sup>, Marion  
4 Muhly-Reinholz<sup>1</sup>, Wesley T. Abplanalp<sup>1,2</sup>, David John<sup>1</sup>, Giulia K. Buchmann<sup>4</sup>, Stephan  
5 Angendohr<sup>5,6</sup>, Ehsan Amin<sup>5,6</sup>, Katharina Scherschel<sup>6,7</sup>, Nikolaj Klöcker<sup>7</sup>, Malte Kelm<sup>5</sup>, Dominik  
6 Schüttler<sup>9,10,11,12</sup>, Sebastian Clauss<sup>9,10,11,12</sup>, Stefan Guenther<sup>3,13</sup>, Thomas Boettger<sup>2,3,13</sup>, Thomas  
7 Braun<sup>2,3,13</sup>, Christian Bär<sup>14,15</sup>, Eleonora Nardini<sup>16</sup>, Selma Osmanagic-Myers<sup>16</sup>, Christian  
8 Meyer<sup>7,8</sup>, Andreas M. Zeiher<sup>2,3</sup>, Ralf P. Brandes<sup>2,3,4</sup>, Guillermo Luxán<sup>1,2,3</sup>, Stefanie  
9 Dimmeler<sup>1,2,3,\*</sup>

10 \*corresponding author, [dimmeler@em.uni-frankfurt.de](mailto:dimmeler@em.uni-frankfurt.de)

11 <sup>1</sup>Institute of Cardiovascular Regeneration, Centre for Molecular Medicine, Goethe University  
12 Frankfurt, Theodor Stern Kai 7, 60590 Frankfurt, Germany.

13 <sup>2</sup>German Center for Cardiovascular Research (DZHK), Partner Site Rhein-Main, Frankfurt,  
14 Germany.

15 <sup>3</sup>Cardiopulmonary Institute (CPI), Frankfurt, Germany.

16 <sup>4</sup>Institute for Cardiovascular Physiology, Centre for Molecular Medicine, Goethe University  
17 Frankfurt, Theodor Stern Kai 7, 60590 Frankfurt, Germany.

18 <sup>5</sup>Division of Cardiology, Pulmonology and Vascular Medicine, Medical Faculty, Heinrich-  
19 Heine-University Düsseldorf, Moorenstraße 5, 40225, Düsseldorf, Germany.

20 <sup>6</sup>Cardiovascular Research Institute Düsseldorf (CARID), Medical Faculty and University  
21 Hospital of Düsseldorf, Heinrich-Heine University Düsseldorf, Moorenstraße 5, 40225,  
22 Düsseldorf, Germany.

23 <sup>7</sup>Institute of Neural and Sensory Physiology, Medical Faculty and University Hospital  
24 Düsseldorf, Heinrich-Heine-University Düsseldorf, Germany

25 <sup>8</sup>Division of Cardiology/Angiology/Intensive Care, EVK Düsseldorf, cNEP, cardiac Neuro- and  
26 Electrophysiology Research Consortium, Düsseldorf, Germany

27 <sup>9</sup>Department of Medicine I, University Hospital Munich, Ludwig Maximilian University,  
28 Marchioninistrasse 15, 81377 Munich, Germany

29 <sup>10</sup>Institute of Surgical Research at the Walter-Brendel-Centre of Experimental Medicine,  
30 University Hospital, LMU Munich, Munich, Germany

31 <sup>11</sup>German Center for Cardiovascular Research (DZHK), Partner Site Munich, Munich Heart  
32 Alliance (MHA), Munich, Germany

33 <sup>12</sup>Interfaculty Center for Endocrine and Cardiovascular Disease Network Modelling and  
34 Clinical Transfer (ICON), LMU Munich, Munich, Germany

35 <sup>13</sup>Max Planck Institute for Heart and Lung Research, 61231 Bad Nauheim, Germany.

36 <sup>14</sup>Institute of Molecular and Translational Therapeutic Strategies (IMTTS), Hannover Medical  
37 School, Carl-Neuberg-Str. 1, 30625 Hannover, Germany

38 <sup>15</sup>REBIRTH-Centre for Translational Regenerative Medicine, Hannover Medical School,  
39 Hannover, Carl-Neuberg-Str. 1, 30625 Hannover, Germany.

40 <sup>16</sup>Institute of Medical Chemistry, Center for Pathobiochemistry and Genetics, Medical  
41 University of Vienna, Vienna A-1090, Austria.

42 **Abstract (167 words)**

43 Aging is a major risk factor for impaired cardiovascular health. The aging myocardium is  
44 characterized by electrophysiological dysfunctions such as a reduced heart rate variability.  
45 These alterations can be intrinsic within cardiomyocytes, but might be modulated by the  
46 cardiac autonomic nervous system, as well<sup>1</sup>. It is known that nerves align with vessels during  
47 development<sup>2</sup>, but the impact of aging on the cardiac neuro-vascular interface is unknown.  
48 Here, we report that aging reduces nerve density specifically in the left ventricle and  
49 dysregulates vascular-derived neuro-regulatory genes. Aging leads further to a down-  
50 regulation of miR-145 and de-repression of the neuro-repulsive factor Semaphorin-3A. miR-  
51 145 deletion increased *Sema3a* expression and reduced axon density, thus mimicking the  
52 observed aged heart phenotype. Removal of senescent cells, which accumulated with  
53 chronological age while nerve density declined, rescued from age-induced denervation,  
54 reduced *Sema3a* expression and preserved heart rate variability. These data suggest that  
55 senescence-associated regulation of neuro-regulatory genes contributes to a declined nerve  
56 density of the aging heart and thereby to a reduced heart rate variability.

57

58

59

60 **Main Text (2046 words)**

61 The vasculature and nervous system form complex, highly branched networks, which are  
62 frequently interdependent and functionally linked. Vessel-nerve alignments are mediated by  
63 nerve-derived signals that act on endothelial cells or, conversely, the formation of nerve fibers  
64 along a preformed vessel template<sup>2</sup>. Thereby, guidance cues such as Semaphorins,  
65 Eph/ephrins and vascular endothelial growth factor (VEGF)/VEGFR regulate vessels and  
66 neurons, and extend or repel axonal growth<sup>3</sup>. Afferent and efferent cardiac neurotransmission  
67 via sympathetic and parasympathetic cardiac nerves modulates many physiological functions  
68 of the heart. Hence imbalances of either branches can lead to arrhythmias. For instance,  
69 impaired cardiac parasympathetic activity is a negative prognostic indicator and can lead to  
70 ventricular arrhythmia<sup>4,5</sup>, whereas both excessive<sup>6-8</sup> and reduced<sup>9</sup> sympathetic activity can  
71 lead to arrhythmias. Moreover, cardiac denervation lead to silent ischemia and lethal  
72 arrhythmia in diabetic hearts<sup>5,9,10</sup>. A reduced heart rate variability is indicative of an impairment  
73 of both parasympathetic and sympathetic innervation in the elderly and has a negative  
74 prognostic value<sup>11</sup>. Beyond the control of electrical stability, innervation has additional  
75 functions and, for example, is essential for regeneration of the heart, as shown in postnatal  
76 post-infarction regeneration models in mice<sup>12,13</sup>. In the vasculature and in other organs  
77 innervation can control inflammation<sup>14,15</sup>. However, whether aging has an impact on cardiac  
78 innervation on a cellular and mechanistic level is unknown.

79  
80 Here, we explored the impact of aging on nerve density in old mice. We used 18-20 month old  
81 male C57Bl/6J mice, which revealed diastolic dysfunction, while ejection fraction was  
82 preserved (**Suppl. Fig. 1a, b**). Pan-neuronal staining for Tuj1 showed a robust reduction of  
83 axon density in 18-month old mouse hearts compared to 12 week old young mice (**Fig.1a**).

84 The age-induced reduction in nerve density was specifically detected in the left ventricle, while  
85 the right ventricular innervation was comparable between old and young mice (**Fig.1b, c**). The  
86 extend of age-dependent decline in the epicardial region was not as strong as in the sub-  
87 endocardial and myocardial regions, but high magnification images proofed a robust decline  
88 of sub-epicardial axon density in aged hearts as well (**Fig.1b; Suppl. Fig. 2a**). This observation  
89 was further confirmed in whole mount staining of old mouse hearts, which showed a decline in  
90 nervous fibers across the left posterior wall (**Fig.1d**). To assess the specific time-point when  
91 denervation starts, we performed a time course study showing a decline of nerve density  
92 already at 16 month of age with a further decline at 22 months (**Fig.1e; Suppl. Fig. 2b**).

93  
94 Next, we assessed which types of nerves are affected by aging. The heart is innervated by  
95 sympathetic, parasympathetic and sensory fibers, which are commonly stained for tyrosine  
96 hydroxylase (TH)<sup>16,17</sup>, choline acetyltransferase (ChAT)<sup>18,19</sup> and calcitonin gene-related peptide

97 (CGRP)<sup>20</sup>, respectively. TH-positive nerves were present in both ventricles, but were  
98 selectively reduced in the left ventricle of aged mice (**Fig.1f**). ChAT-positive nerves were  
99 sparse in either ventricles and only occasionally detected in the cardiac base of young hearts  
100 (**Fig.1g**). Sensory neurons were exclusively detected in perivascular regions and were also  
101 significantly diminished by age (**Fig.1h**). Aging additionally resulted in a higher incidence of  
102 ventricular tachycardia and arrhythmias in Langendorff perfused hearts of 18 month old mice  
103 compared to young mice (**Suppl. Fig. 3**) documenting increased electrical instability. Together  
104 these data demonstrate a decline of cardiac innervation in the left ventricle of old aged mice.  
105

106 To shed light on the functional consequences that arise from the age-associated cardiac  
107 denervation, we assessed heart rate variability by time domain and frequency domain analyses  
108 in awake mice using telemetric ECG tracing. In line with a recent report<sup>21</sup>, we observed a  
109 reduced variation of the RR-intervals (SDNN) in aged versus young mice (**Fig. 1i**). Especially,  
110 frequency-domain analyses as assessed by LF/HF ratio, which can be considered as an  
111 indicator for the sympatho-vagal balance<sup>22</sup>, was reduced with age, suggesting a reduced  
112 sympathetic activity in aged animals (**Fig. 1j**). The day-night-rhythm was also impaired with  
113 age (**Fig. 1i, j**). Taken together, aging leads to left ventricle-specific decrease in neuronal  
114 density that correspond to decreased heart rate variability and arrhythmias.  
115

116 The vasculature and the nervous system co-develop and remain aligned also in the mature  
117 heart (**Fig. 2a**). To address if the decline in nerve density may be secondary to age-related  
118 capillary rarefaction, we histologically assessed capillary density over 22 months (**Suppl. Fig.**  
119 **4**). However, capillary density only decreased at 22 months (**Suppl. Fig. 4**). At 16 months,  
120 when the initial decline of nerve density was observed, no difference in capillary density was  
121 detectable excluding that the reduction of nerves is secondary to the loss of capillaries.  
122 However, vascular alignment of nerves is lost in 18-month old mouse hearts (**Fig. 2b, c**), which  
123 might have been caused by a dysregulation of neuro-guidance cues in the vasculature.  
124

125 To address, if neuro-guidance cues might be dysregulated in the cardiac endothelium of the  
126 aging heart, we isolated endothelial cells from young and old mice and performed RNA  
127 sequencing. GO term analysis of significantly induced genes demonstrated pathways assigned  
128 to “neuronal death” and “axon injury”, (**Fig. 2d**). Genes in these pathways include Semaphorin-  
129 3a (*Sema3a*), which patterns the autonomic nervous system during development<sup>23</sup>.  
130 Semaphorin-3A is further essential to maintain normal heart rhythm through sympathetic  
131 innervation patterning, but induces vulnerability to arrhythmias if overexpressed in  
132 cardiomyocytes<sup>6</sup> (**Fig. 2e**). In addition, we found upregulation of members of the Slit/Robo  
133 family, such as *Slit3*, which can mediate repulsive signals<sup>24</sup>, and *Netrin-1* (*Ntn1*), a laminin-

134 related secreted protein, which may switch attraction to repulsive responses in a dose-  
135 dependent manner<sup>25</sup> (**Fig. 2e**). Interestingly, recent studies suggest that the combination of  
136 guidance factors (such as Slit-family members and Netrin-1) can act in concert to modulate  
137 cellular responses<sup>25</sup>. Validation of protein expression confirmed the upregulation of  
138 Semaphorin-3A in aged mouse hearts (**Fig. 2f**) and further showed that Semaphorin-3A is  
139 predominantly expressed by vascular cells (**Fig. 2g**).

140  
141 Since both overexpression and deletion of *Sema3a* may lead to sudden cardiac death and  
142 ventricular fibrillation<sup>7</sup>, we investigated up-stream pathways, which may control age-induced  
143 induction of *Sema3a*. *Sema3a*-mRNA has two miR-145 binding sites in the 3'UTR<sup>26</sup> (**Fig. 2h**),  
144 and miR-145-5p was significantly reduced in the aging heart (**Fig. 2i**). Therefore, we  
145 hypothesize that miR-145 might repress *Sema3a* in the young heart. Overexpression of miR-  
146 145 indeed repressed *Sema3a* in human umbilical cord vein endothelial cells *in vitro* (**Fig. 2j**).  
147 Furthermore, *miR-143/145*<sup>-/-</sup> mice showed increased levels of Semaphorin-3a among vessels  
148 (**Fig. 2k**) and reduced axon density (**Fig. 2l**) even at young age (10-15 weeks). Together, these  
149 data suggest that loss of miR-145 induced de-repression of *Sema3a* is sufficient to reduce  
150 cardiac nerve density.

151 Importantly, *SEMA3A* was also up-regulated in senescent endothelial cells, which were  
152 generated by continuous passaging to induce replicative senescence as evidenced by acidic  
153  $\beta$ -galactosidase staining (**Fig. 3a, b**). Interestingly, cellular senescence is induced  
154 concomitantly in the aging mouse hearts when neuronal density declines at 16 months (**Fig.**  
155 **3c-e**). Moreover, genetic models of premature senescence such as 4<sup>th</sup> generation *Tert*<sup>-/-</sup> mice  
156 that lack telomerase confirmed a decline in nerve density (**Fig.3f, g**). By applying a senescent  
157 score<sup>27</sup> to our previously published single nuclei RNA sequencing data of young vs. old mouse  
158 hearts<sup>28</sup>, we identified endothelial cells to acquire the most senescent phenotype (**Suppl. Fig.**  
159 **5a**). Bulk RNA sequencing data of isolated cardiomyocytes<sup>29</sup>, fibroblasts<sup>28</sup> and endothelial cells  
160 confirmed the up-regulation of senescence marker genes predominantly in aged cardiac  
161 endothelial cells (**Suppl. Fig. 5b**). This suggests that endothelial senescence might contribute  
162 to neuronal repulsion or death. Indeed, the selective induction of endothelial cell senescence  
163 in young animals by endothelial-specific overexpression of progerin<sup>30</sup> significantly reduced the  
164 density of Tuj1 positive nerves compared to wildtype littermates (**Fig. 3h**). Taken together,  
165 different models of premature senescence indicate that the induction of (endothelial)  
166 senescence is sufficient to induce cardiac sympathetic denervation.

167  
168 To determine if interfering with cellular senescence might prevent cardiac denervation in the  
169 aged heart, we treated old mice with 5 mg/kg dasatinib and 50 mg/kg quercetin, a combination  
170 of senolytics, which was shown to reduce the number of senescent cells by targeting anti-

171 apoptotic pathways and expands life span *in vivo*<sup>31,32</sup>. Treatment was applied via oral gavage  
172 to aged mice (18 months) on three consecutive days, every second week for a total duration  
173 of two months (**Fig. 4a**). At 2 months after start of the treatment, the number of senescent  
174 acidic  $\beta$ -galactosidase-positive cells was significantly lower as compared to placebo-treated  
175 controls (**Fig. 4b, c**). Importantly, the reduction in senescent cells was paralleled by a rescue  
176 of Tuj1-positive nerves by senolytic treatment (**Fig. 4d**). Consistently, senolytic treatment  
177 augmented heart rate variability as assessed by the LF/HF ratio already 2 weeks after start of  
178 the treatment (**Fig. 4e, f**). Two months of senolytics treatment further improved the LF/HF ratio  
179 in aged mice, and restored the characteristic day-night-rhythm, while old control mice further  
180 deteriorated in the autonomous function (**Fig. 4f; Suppl. Fig. 6a, b**). These data indicate that  
181 senolytics induce a re-innervation of the aging heart, which restores the sympatho-vagal  
182 balance. In addition, senolytics treatment improved cardiac function as evidenced by a  
183 normalized diastolic function at 4 and 8 weeks of treatment (**Suppl. Fig. 7a, b**) and reduced  
184 vulnerability to arrhythmia as assessed by Langendorff-perfused hearts 8 weeks after  
185 senolytics treatment (**Suppl. Fig. 8**).

186  
187 To provide mechanistic insights into how senolytics rescue cardiac innervation, we performed  
188 single nuclei RNA sequencing of old mouse hearts treated with senolytics or placebo (**Fig. 4g**).  
189 Interestingly, senolytic treatment affected genes associated with “nervous system  
190 development” within the top-regulated genes of cardiac endothelial cells (**Fig. 4h**). Importantly,  
191 *Sema3a*, which we showed to be de-repressed in the aging heart, was significantly reduced in  
192 old heart endothelial cells after senolytic treatment (**Fig. 4i**).

193  
194 Here, we demonstrate that aging reduces axon density in the heart. Aging induced decline in  
195 axon density was associated with reduced miR-145 levels and de-repression of its target, the  
196 neuronal repulsive signal Semaphorin-3A, which is well known to induce electrical instability in  
197 the heart. Interestingly, induction of cellular senescence, which is a hallmark of aging, was  
198 inversely correlated with the onset of axon decline. Targeting senescent cells  
199 pharmacologically was sufficient to prevent the decline in axon density and reduced *Sema3a*  
200 expression in the aging heart suggesting a key role of senescent cells in cardiac denervation.  
201 Senescent cells release numerous secreted factors, termed senescence-associated secretory  
202 phenotype (SASP), which profoundly alters the microenvironment in the aging heart. Although  
203 neuronal guidance factors have not been reported as general SASPs, Semaphorin-3A is  
204 induced in senescent endothelial cells and may represent a specific vascular SASP in the  
205 aging heart.

206



207 The question which cell type(s) further contributes to the observed effects will need further  
208 studies. We demonstrate that the selective induction of pre-mature aging in endothelial cells is  
209 sufficient to reduce nerve density. However, we cannot exclude the involvement of other cells  
210 in this process. Interestingly, there was a tendency that *Sema3a* was also de-repressed by  
211 senolytic treatment in other vascular cells, namely pericytes, whereas e.g. fibroblasts showed  
212 very low levels and no *Sema3a* regulation (**Suppl. Fig. 9**). Moreover, neuronal and axonal  
213 related pathways were found within the top-25-regulated GO terms in lymphatic endothelial  
214 cell and in some fibroblast clusters of mice treated with senolytics (**Suppl. Tab. 1**). These  
215 findings indicate that endothelial cells may play a critical role in age-related denervation, but  
216 other cells such as pericytes or fibroblasts may contribute as well to the observed phenotype.

217

218 Our study additionally demonstrates that senolytic treatment restores vulnerability to  
219 arrhythmia, heart rate variability and the circadian rhythm. A decline in heart rate variability is  
220 typically observed in the elderly, is indicative of impaired sympathetic and parasympathetic  
221 innervation and is associated with increased electrical instability leading to increased overall  
222 mortality<sup>11</sup>. Our finding that senolytics normalizes heart rate variability during aging, thus,  
223 supports a functional benefit of the treatment.

224

225 Innervation is not only important for the control of heart rhythm but nerves were shown to  
226 provide important paracrine factors, which for example contribute to cardiac regeneration<sup>12,13</sup>.  
227 A decline in nerve density may consequently lead to depletion of such nerve-derived factors  
228 influencing the reparative function of the heart as it was demonstrated for myocardial infarction  
229 in adult mice<sup>33</sup>. Moreover, in other tissues, nerves interact with immune cells<sup>34</sup> and can control  
230 vascular inflammation<sup>14</sup>. Since inflammation is a hallmark of aging (“inflammaging”), the relation  
231 of neuro-immune interactions in the heart may deserve further studies. Together, the  
232 presented findings may lay the ground to decipher neuronal cross-talks in the heart and their  
233 role in aging.

234

235

236 **Methods**

237 **Laboratory animals**

238 Isogenic male C57Bl/6J wildtype mice were purchased from Janvier (Le Genest Saintisle,  
239 France) and from Charles River (Sulzfeld, Germany). Homozygosity of these inbred mice was  
240 controlled by Janvier and Charles River using exome sequencing.

241 *miR143/145* gene cluster knockout mice were generated as previously described<sup>35</sup>. Male and  
242 female *miR143/145* gene cluster knockout mice with an C57Bl/6J background and an age  
243 between 10 to 15 weeks were used.

244 Pre-mature senescence was studied in male *Tert*-knockout mice (4<sup>th</sup> generation, 10 to 15  
245 weeks old) with an C57Bl/6J background as previously described<sup>36,37</sup>.

246 Endothelial-specific progeria mice were generated as previously described<sup>30</sup>. Male and female  
247 mice were use at the age of 28 to 29 weeks.

248 To obtain hearts, mice were sacrificed via cervical dislocation during isoflurane anesthesia and  
249 perfused with cold Hank's buffered saline solution (HBSS; 14175-053, Invitrogen).

250 Mice were housed in individually ventilated cages in a specific pathogen-free facility according  
251 to national and institutional guidelines for animal care.

252 **Senolytic treatment**

253 To eliminate senescent cells from aged mice, a combination of the two senolytics drugs  
254 dasatinib and quercetin was used as proposed by Xu et al.<sup>38</sup>. In brief, 5 mg/kg dasatinib  
255 (SML2589-50MG; Merck) and 50 mg/kg quercetin (Q4951-10G, Sigma-Aldrich) were applied  
256 via oral gavage to aged mice (18 months) on three consecutive days, every second week for  
257 a total duration of two months. Young (12-16 weeks) and aged (18-19 months) mice receiving  
258 the solvent (Phosal 50PG (368315, Lipoid) containing 3.3% ethanol (32221, Sigma-Aldrich)  
259 and 10% polyethylene glycol 400 (807485, Merck)) served as control cohorts. Cardiac function  
260 was monitored during the experiment using echocardiography and ECG traces as described  
261 below. The animal experiment has been conducted as approved by the state of Hessen (animal  
262 application number FU/1269).

263 **Echocardiography**

264 To assess heart function via echocardiography, mice were anaesthetized (2-2.5% isoflurane)  
265 and monitored using the Vevo 3100 echocardiography system with the Vevo LAB software  
266 (Fujifilm VisualSonics).

267



## 268 **Telemetric ECG measurement**

269 To record long-term ECG traces remotely in awake mice, ETA-F10 transmitters (270-0160-  
270 002, DSI) were implanted subcutaneously as described by the provider's instruction. In brief,  
271 buprenorphine (0.1 mg/kg) was injected i.p. to mice 30 minutes before starting the surgery.  
272 Then mice were anaesthetized (1.5% isoflurane) and an incision was made on the left  
273 anatomical side of the mouse. The transmitter was covered with polymyxin and placed  
274 subcutaneously. The electrodes were stitched to the pectoral muscles in Einthoven II position.  
275 The wound was closed and mice received metamizol on three consecutive after surgery as  
276 post-surgical treatment. The animal experiment has been conducted as approved by the state  
277 of Hessen (animal application number FU/1269). ECG traces were recorded and time and  
278 frequency domain were analyzed using the software Ponemah 6.

## 279 **Assessment of ventricular arrhythmia inducibility**

280 After anaesthesia by isoflurane and cervical dislocation hearts were rapidly excised by opening  
281 the thorax and immediately placed in ice-cold buffer solution (modified Krebs-Henseleit  
282 solution; mM: NaCl 119, NaHCO<sub>3</sub> 25, KCL 4.6, KH<sub>2</sub>PO<sub>4</sub> 1.2, MgSO<sub>4</sub> 1.1, CaCl<sub>2</sub> 2.5, C<sub>6</sub>H<sub>12</sub>O<sub>6</sub>  
283 8.3 and Na-Pyruvate 2; pH 7.4)<sup>5</sup>. The ascending aorta was pulled over a cannula, hearts were  
284 transferred into a Langendorff apparatus and the cannula was rapidly attached to keep no flow  
285 time as short as possible. Hearts were electro-mechanical uncoupled by blebbistatin added to  
286 the perfusion buffer (5 – 10 µM, Hoelzel Biotech). Perfusion pressure and heart rate were  
287 continuously monitored (Powerlab 8/30 & Labchart, ADInstruments). Perfusion flow was  
288 manually regulated based on the perfusion pressure (80 – 100 mmHg) using a peristaltic pump  
289 (Regalo Masterflex Masterflex, Ismatec)<sup>39</sup>. An octopolar electrophysiology catheter (2.0 F, 0.5  
290 mm electrode spacing; CIBer Mouse, NuMed) was placed in the right ventricle to stimulate the  
291 heart and to continuously obtain atrial and ventricular electrograms<sup>5,40</sup>. For equilibration the  
292 heart was paced at 600 bpm for 30 minutes. Perfusion buffer was continuously oxygenated  
293 using carbogen (95% O<sub>2</sub>/5% CO<sub>2</sub>). Hearts which presented relevant arrhythmias or visible  
294 ischemia after equilibration were excluded. To assess susceptibility to ventricular arrhythmias  
295 (VA) we used a stimulation protocol based on three maneuvers: (1) Programmed  
296 extrastimulation: train of eight S1-stimuli (cycle length (CL) 100 ms) followed by two or three  
297 extrastimuli with a decremental S2S3- or S3S4-interval with a stepwise (2 ms) reduction (60 –  
298 20 ms). (2) Miniburststimulation: train of 20 S1-stimuli (CL 100 ms) followed by ten S2-stimuli  
299 with a decremental S2-interval with a stepwise (2 ms) reduction (60 – 20 ms). (3)  
300 Burststimulation: train of 20 – 100 S1-stimuli with a decremental S1-interval (50 – 10 ms). VAs  
301 were classified using an established scoring system<sup>40</sup>.

302

### 303 **Single-nucleus RNA sequencing**

304 To assess the cardiac transcriptome on single nuclear level, nuclei isolation from mouse  
305 hearts, single-nuclei separation, library preparation and sequencing were performed as  
306 previously described<sup>41</sup>.

### 307 **Single-nucleus RNA sequencing data analyses:**

308 To analyze single-nucleus RNA sequencing mouse data of senolytic and the control treated  
309 mice, the samples were mapped to the mice reference genome (GRCm38) via STARsolo  
310 (version 2.7.9) with the parameter "-- soloFeatures GeneFull". Data integration,  
311 normalisation, scaling and UMAP clustering were performed with Seurat (version 4.1.1),  
312 according to the developer's tutorial  
313 ([https://satijalab.org/seurat/articles/pbmc3k\\_tutorial.html](https://satijalab.org/seurat/articles/pbmc3k_tutorial.html)). After filtering of nuclei based on  
314 mitochondrial content (<5%) and genes per nucleus (<2500) a total 13541 single nuclei were  
315 analyzed from 6 different samples.

316 Differential expressed genes were tested using the FindAllMarkers function with the  
317 statistical test bimod in the Seurat package. Genes with adjusted p-values <0.05 were  
318 considered as differential expressed genes.

### 319 **Whole mount immunofluorescence staining**

320 After sacrificing mice, hearts were perfused with 4% PFA (28908, ThermoFisher Scientific) in  
321 PBS, harvested and incubated in 4% PFA for 4h at 4°C. Hearts were washed trice with PBS  
322 for 5 minutes and bleached overnight at room temperature using DMSO (A994.2, Carl Roth  
323 GmbH & Co. KG) and H<sub>2</sub>O<sub>2</sub> (8070.2, Carl Roth GmbH & Co. KG) diluted 1:1:4 (vol/vol/vol) in  
324 PBS. Hearts were washed trice with PBS for 20 minutes each followed by antigen retrieval by  
325 incubating whole hearts in retrieval buffer (4% SDS (CN30.3, Carl Roth GmbH & Co. KG) and  
326 200 mM boric acid (191411, MP Biomedicals)) for 1h at room temperature followed by  
327 overnight incubation at 54°C. Hearts were again washed trice in PBT (0.2% Triton X-100 in  
328 PBS) for 1h each and incubated in blocking solution (10% FBS (4133, Invitrogen), 1% BSA  
329 (A7030-10G, Merck), 5% donkey serum (017-000-121, Jackson Immuno) in PBT) for 1h at  
330 room temperature. Rabbit anti-Tuj1 antibody (ab18207, Abcam) was diluted 1:100 in blocking  
331 solution and incubated with the hearts for 3 days at room temperature. Hearts were then  
332 washed trice in PBS for 20 minutes and incubated with the secondary antibody (donkey anti-  
333 rabbit antibody conjugated to Alexa 555; A-31572, Invitrogen) that was diluted 1:100 for at  
334 least 2 days at room temperature. Hearts were again washed trice for 20 minutes in PBS and  
335 embedded in agarose (9012-36-6, Carl Roth GmbH & Co. KG). Hearts were dehydrated at  
336 room temperature in an ascending methanol series (30%, 50%, 75%, 30 minutes each) and  
337 incubated twice in 100% methanol at room temperature for 30 minutes each. Hearts were  
338 washed twice in ECI (112372, Sigma-Aldrich) for 5 minutes and cleared by incubating in 80%  
339 ECI and 20% PEGM (447943, Sigma-Aldrich) for 30 minutes at room temperature.

340 Whole hearts were assessed histologically using a light sheet microscope (Ultramicroscope II,  
341 LaVision BioTec, Bielefeld, Germany) . Excitation was performed at 470/40 nm and emission  
342 525/50 nm (autofluorescence tissue), excitation 545/30 nm and emission 595/40 nm(Tuj). Main  
343 laser power 95% and software laser power for 470/40 95% and 525/50 35%. Step size was  
344 set to 5  $\mu$ m. Exposure time was 300 ms, 6,3x magnification (10x zoom body + 0.63x  
345 Objective). Sheet width 60%; Sheet NA 4,05um; two sided scan. Pictures were taken with a  
346 Neo 5.5 (3-tap) sCOMs Camera (Andor, Mod. No.: DC-152q-C00-FI). Images were analyzed  
347 using the Imaris software, version 9.

### 348 **Immunofluorescence staining of cryopreserved heart sections**

349 After sacrificing mice, hearts were flushed with cold HBSS and fixed in PBS containing 4%  
350 PFA (28908, ThermoFisher Scientific). After overnight incubation at 4°C, hearts were washed  
351 three times for 10 minutes in PBS. To cryopreserve cardiac tissues, three consecutive  
352 overnight washes in PBS containing increasing concentrations of sucrose (10%, 20%, 30%;  
353 S0389, Sigma-Aldrich) were applied at 4°C. Tissues were embedded in PBS containing 15%  
354 sucrose, 8% gelatin (G1890, Sigma-Aldrich), and 1% polyvinylpyrrolidone (P5288, Sigma-  
355 Aldrich). After the embedding solution was solidified, tissues were stored at -80°C.

356 Hearts were sectioned at 50  $\mu$ m-thickness using a cryostat (Leica CM3050 S). Sections were  
357 placed on adhesive glass slides (10149870, ThermoFisher Scientific) and stored at -20°C until  
358 use.

359 For immunofluorescence staining, cryo sections were brought to room temperature and re-  
360 hydrated in PBS (twice for 5 minutes). To permeabilize the tissue, sections incubated with PBS  
361 containing 0.3% Triton X-100 three times for 10 minutes and were blocked in PBS containing  
362 0.1% Triton X-100, 3% BSA (A7030-10G, Merck) and 5% donkey serum (ab7475, Abcam) for  
363 1h at room temperature. Primary antibodies were diluted in blocking solution and incubated  
364 with the sections overnight at 4°C. Sections were then washed three times for 5 minutes in  
365 PBS and incubated for 1h at room temperature with the respective secondary donkey  
366 antibodies that were diluted in PBS containing 0.1% Triton X-100. Nuclei were stained with  
367 DAPI (6335.1, Carl Roth GmbH & Co. KG) that was diluted 1:1000 in 0.1% Triton X-100. After  
368 washing trice in PBS for 5 minutes, slides were mounted with Fluoromount-G™ (00-4958-02,  
369 Invitrogen). Sections were histologically assessed using the Leica Stellaris confocal  
370 microscope and the LASX software.

### 371 **Immunofluorescence staining of paraffin heart sections**

372 To assess hearts histologically on paraffin sections, hearts were processed and embedded as  
373 previously described<sup>28</sup>. To immunolabel paraffin section, slides incubated for 1h at 60°C and  
374 were deparaffinized twice with xylene for 10 minutes and an ethanol series of 100%, 95%,  
375 80%, 70%, and 50% ethanol (5 minutes each step). Sections were washed in water for 5

376 minutes and were boiled in 0.01 M citrate buffer (pH = 6) for 90 seconds. Slides were then  
377 washed for 5 minutes with PBS and blocked in PBS containing 0.1% Triton X-100, 3% BSA  
378 (A7030-10G, Merck) and 5% donkey serum (ab7475, Abcam) for 1h at room temperature.  
379 Primary antibodies were diluted in blocking solution and incubated with the sections overnight  
380 at 4°C. Sections were then washed three times for 5 minutes in PBS and incubated for 1h at  
381 room temperature with the respective secondary donkey antibodies that were diluted in PBS  
382 containing 0.1% Triton X-100. Nuclei were stained with DAPI (6335.1, Carl Roth GmbH & Co.  
383 KG) that was diluted 1:1000 in 0.1% Triton X-100. After washing trice in PBS for 5 minutes,  
384 slides were mounted with Fluoromount-G™ (00-4958-02, Invitrogen). Sections were  
385 histologically assessed using the Leica Stellaris confocal microscope and the LASX software.

### 386 **Antibodies**

387 Following primary antibodies have been uses:

388 Rb anti-Tuj1 (1:100, ab18207, Abcam), Rb anti-tyroxine hydroxylase (1:100, AB152, Merck),  
389 Gt anti-Choline Acetyltransferase (1:100, AB144P, Merck), Gt anti-calcitonin gene-related  
390 peptide (1:100, ab36001, Abcam), Ms anti- $\alpha$ -Smooth Muscle - Cy3™ (1:200, C6198-2ML,  
391 Sigma-Aldrich), Rb anti-Semaphorin-3A (1:100, ab23393, Abcam) and GSL I - isolectin B4  
392 (biotinylated; 1:25, VEC-B-1205, Biozol).

393 Following secondary antibodies have been used:

394 Donkey anti-mouse IgG Alexa Fluor 647 (1:200, A-31571, Invitrogen), Donkey anti-rabbit IgG  
395 Alexa Fluor 555 (1:200, A-31572, Invitrogen), Donkey anti-rabbit IgG Alexa Fluor 488 (1:200,  
396 A-21206, Invitrogen), Donkey anti-Goat IgG Alexa Fluor 555 (1:200, A-21432, Invitrogen),  
397 Donkey anti-Goat IgG Alexa Fluor 647 (1:200, A-21447, Invitrogen), Streptavidin, Alexa  
398 Fluor™ 405 (1:200, S32351, Invitrogen) and Streptavidin, Alexa Fluor™ 647 (1:200, S32357,  
399 Invitrogen).

### 400 **Quantification of immunofluorescence images**

401 To analyze and quantify immunofluorescence images, the stained area was determined and  
402 normalized to IB4- or DAPI-positive area using the software Volocity 7 by Quorum  
403 Technologies Inc.

### 404 **Acidic beta-galactosidase staining**

405 Acidic beta-galactosidase positive cells were visualized on cryopreserved heart sections and  
406 *in vitro* using the Senescence  $\beta$ -Galactosidase Staining kit (9860, CST) according to the  
407 manufacturer's instruction.  $\beta$ -galactosidase-positive areas were quantified using ImageJ.

### 408 **Endothelial cell isolation from murine hearts**

409 Cardiac endothelial cells were isolated from young (12 weeks) and old (20 months) mice.  
410 Under isoflurane anesthesia, mice were sacrificed and hearts were flushed with HBSS. The

411 hearts were harvested, dissected in small pieces, transferred into a C-tube (130-096-334,  
412 Miltenyi Biotec) and incubated in HBSS, containing 600 U/mL collagenase type II (354236,  
413 Corning), at 37°C and 5% CO<sub>2</sub> in a humidified atmosphere. After 30, 20 and 10 minutes of  
414 incubation, tissue particles were further dissected using the GentleMACS Dissociator (Miltenyi  
415 BioTec) with the pre-set program m\_neoheart\_01\_01. Collagenase digestion was stopped with  
416 500 µL fetal bovine serum (4133, Invitrogen). Cell suspension was applied on a 200 µm cell  
417 strainer (43-50200-03, pluri-Select), centrifuged at 80x g and 4°C for 1 minute to deplete  
418 cardiomyocytes and applied on a 70 µm cell strainer (43-50070-03, pluri-Select). Cells were  
419 washed twice with HBSS containing 0.5% bovine serum albumin (T844.3, Carl Roth GmbH &  
420 Co. KG) and 2 mM EDTA (A4892, AppliChem) (referred to as wash buffer in the following) by  
421 centrifugation (300x g at 4°C for 10 minutes). Endothelial cells were isolated using rat anti-  
422 mouse CD144 antibodies (555289, BD Bioscience) and magnetic sheep anti-rat dynabeads  
423 (11035, Life Technologies). During tissue dissection, anti-CD144 antibody-bead mixture was  
424 prepared by washing 25 µL dynabeads twice with wash buffer and re-suspending them in 400  
425 µL wash buffer. 1 µL of antibodies were added to the beads, incubated for 1h at room  
426 temperature and were washed trice with wash buffer. Antibody-bead mixture was re-  
427 suspended in 1000 µL wash buffer, added to the cardiac cell pellet and incubated for 40  
428 minutes on a turning wheel. Cells were washed trice on a magnetic rack using 1000 µL of wash  
429 buffer and lysed with 700 µL of Qiazol.

### 430 **RNA isolation**

431 Total RNA was purified from cultured and isolated cells by using the miRNeasy Mini kits  
432 (217004, Qiagen), combined with on-column DNase digestion (DNase Set, 79254, Qiagen) as  
433 described in the manufacturer's instruction. To isolate RNA from solid hearts, tissue was  
434 combined with 700 µL Qiazol and ¼" ceramic spheres and were homogenized three times for  
435 20 seconds (4 m/s). RNA isolation was then performed using the miRNeasy Mini kit (217004,  
436 Qiagen). The RNA concentration was determined by measuring absorption at 260 nm and 280  
437 nm with the NanoDrop ND 2000-spectrophotometer (PeqLab).

### 438 **cDNA synthesis and quantitative PCR**

439 To quantify mRNA expression by qPCR, 100 ng to 1 µg of total RNA was reverse-transcribed  
440 using the reverse transcriptase M-MLV (28025013, ThermoFisher Scientific) and assessed  
441 using the SYBR™ Green PCR Master Mix (4385617, Applied Biosystems) as previously  
442 described<sup>28</sup>. The primers were customized and purchased from Sigma-Aldrich (now Merck):  
443 human Rpl0 fw (TCGACAATGGCAGCATCTAC); human Rpl0 rev  
444 (ATCCGTCTCCACAGACAAGG); human SEMA3A fw  
445 (TGTTGGGACCGTTCTTAAAGTAGT); human SEMA3A rev  
446 (TAGTTGTTGCTGCTTAGTGGAAG).



#### 447 **Bulk RNA sequencing**

448 Library preparation and whole transcriptome analysis of isolated cardiac endothelial cells were  
449 performed as previously described<sup>28</sup>.

#### 450 **Gene ontology term analysis**

451 Gene ontology (GO-term) analyses were performed using the Enrichr online platform (ontology  
452 category GO Biological Process 2021; <https://maayanlab.cloud/Enrichr/>) by assessing  
453 significantly regulated genes of  $\log_{2}FC > 1$  and  $\log_{2}FC < -1$ .

#### 454 **Micro Array**

455 To assess micro-RNA expression in whole young and old mouse hearts, a published data set  
456 was used<sup>42</sup>.

#### 457 **Cell Culture**

458 Human umbilical cord vein endothelial cells (HUVEC, CC-2935) were purchased from Lonza  
459 and cultured with endothelial basal medium (EBM, CC-3156, Lonza) supplemented with 10 %  
460 FBS (4133, Invitrogen), Amphotericin-B (CC-4081C, Lonza), ascorbic acid (CC-4116C,  
461 Lonza), bovine brain extract (CC-4092C, Lonza), endothelial growth factor (CC-4017C,  
462 Lonza), gentamycin sulfate (CC-4081C, Lonza), and hydrocortisone (CC-4035C, Lonza) at  
463 37°C and 5% CO<sub>2</sub>, with humidified atmosphere. Short passage HUVEC (P2, P3) were used  
464 for *in vitro* studies. To resemble cellular senescence, HUVEC were cultured until at least  
465 passage 13 and were controlled by acidic beta-galactosidase staining.

#### 466 **Transfection experiments**

467 70,000 HUVEC were seeded per well of a 12-well plate (665180, Greiner Bio-One GmbH) and  
468 rested for one day at 37°C and 5% CO<sub>2</sub>. Cells were transfected using the Lipofectamine  
469 RNAiMax (13778150, Invitrogen) according to the manufacturer's protocol. Predesigned miR-  
470 145-5p precursors (4464066 (ID: MC11480), Ambion by Life Technologies) were used in a  
471 final concentration of 10 nM. Cells were cultured for 48h after transfection.

#### 472 **Statistical Analysis**

473 Data are expressed as mean and error bars indicate the standard error of the mean (SEM).  
474 Normality distribution was assessed by using the Kolmogorov-Smirnov or Shapiro-Wilk  
475 normality test. For comparing two groups of Gaussian distributed data, statistical power was  
476 determined using the unpaired, two-sided student's t-test. To compare more than two groups,  
477 an ordinary one-way ANOVA with a post-hoc Tukey comparison was used.

#### 478 **Data availability**

479 All data are available within the article, within the supplemental material or from the  
480 corresponding author on reasonable request. Transcriptomic data are available from the cited



481 publications or at the GEO (accession code will be provided as soon as the manuscript is  
482 accepted for publication).

### 483 **Acknowledgement**

484 The study is supported by the German Research Foundation (SFB1366, Project B4; TRR267,  
485 Project B3 and the Cluster of Excellence Cardiopulmonary Institute Exc2026/1), the German  
486 Center for Cardiovascular Research (DZHK Shared Expertise (B22-014 SE)), the Dr. Rolf-M.-  
487 Schwiete Foundation (2021-002) and the European Research Council.

488

### 489 **Author contributions**

490 JUGW and SD planned the project and wrote the manuscript. JUGW, LMK, JP conducted the  
491 majority of experiments. SG performed bulk RNA sequencing. LST and DJ performed  
492 bioinformatics. WTA performed snRNA sequencing. KAS and MC contributed to transcriptomic  
493 and histological analyses. AF, PFM and RPB contributed to telemetry studies. KS, GKB, MMR  
494 and GL contributed to histology and whole mount staining. SC, DS, SA, EA, NK, MK and CM  
495 contributed to electrophysiology and telemetry studies. GL, CM and AMZ provided conceptual  
496 input. TBo and TBr provided miR145 mice. CB provided Tert mice. EN and SOM provided  
497 Prog-tg mice.

498

### 499 **Conflict of interest**

500 The authors acknowledge grant support as listed, but otherwise do not have a conflict of  
501 interest

502

503

504 **References**

- 505 1. Chadda, K. R. *et al.* Ageing, the autonomic nervous system and arrhythmia: From  
506 brain to heart. *Ageing Res. Rev.* **48**, 40–50 (2018).
- 507 2. Peguera, B., Segarra, M. & Acker-Palmer, A. Neurovascular crosstalk coordinates the  
508 central nervous system development. *Curr. Opin. Neurobiol.* **69**, 202–213 (2021).
- 509 3. Eichmann, A., Le Noble, F., Autiero, M. & Carmeliet, P. Guidance of vascular and  
510 neural network formation. *Curr Opin Neurobiol* **15**, 108–115 (2005).
- 511 4. Shen, M. J. & Zipes, D. P. Role of the autonomic nervous system in modulating  
512 cardiac arrhythmias. *Circ. Res.* **114**, 1004–1021 (2014).
- 513 5. Jungen, C. *et al.* Disruption of cardiac cholinergic neurons enhances susceptibility to  
514 ventricular arrhythmias. *Nat. Commun.* **8**, 14155 (2017).
- 515 6. Ieda, M. *et al.* Sema3a maintains normal heart rhythm through sympathetic innervation  
516 patterning. *Nat. Med.* **13**, 604–612 (2007).
- 517 7. Fukuda, K., Kanazawa, H., Aizawa, Y., Ardell, J. L. & Shivkumar, K. Cardiac  
518 innervation and sudden cardiac death. *Circ. Res.* **116**, 2005–2019 (2015).
- 519 8. Schwartz, P. J. Cardiac sympathetic denervation to prevent life-threatening  
520 arrhythmias. *Nat. Rev. Cardiol.* **11**, 346–353 (2014).
- 521 9. Jungen, C. *et al.* Increased arrhythmia susceptibility in type 2 diabetic mice related to  
522 dysregulation of ventricular sympathetic innervation. *Am. J. Physiol. Heart Circ.*  
523 *Physiol.* **317**, H1328–H1341 (2019).
- 524 10. Ieda, M. *et al.* Nerve growth factor is critical for cardiac sensory innervation and  
525 rescues neuropathy in diabetic hearts. *Circulation* **114**, 2351–2363 (2006).
- 526 11. Nicolini, P., Ciulla, M. M., De Asmundis, C., Magrini, F. & Brugada, P. The prognostic  
527 value of heart rate variability in the elderly, changing the perspective: from  
528 sympathovagal balance to chaos theory. *Pacing Clin. Electrophysiol.* **35**, 622–638  
529 (2012).
- 530 12. Mahmoud, A. I. *et al.* Nerves Regulate Cardiomyocyte Proliferation and Heart  
531 Regeneration. *Dev. Cell* **34**, 387–399 (2015).
- 532 13. White, I. A., Gordon, J., Balkan, W. & Hare, J. M. Sympathetic Reinnervation Is  
533 Required for Mammalian Cardiac Regeneration. *Circ. Res.* **117**, 990–994 (2015).
- 534 14. Mohanta, S. K. *et al.* Neuroimmune cardiovascular interfaces control atherosclerosis.  
535 *Nature* **605**, 152–159 (2022).
- 536 15. Brea, D. & Veiga-Fernandes, H. Inflammation in the gut is encoded by neurons in the  
537 brain. *Nature* vol. 602 217–218 (2022).
- 538 16. Zhang, B. *et al.* Hyperactivation of sympathetic nerves drives depletion of melanocyte  
539 stem cells. *Nature* **577**, 676–681 (2020).
- 540 17. Cardoso, F. *et al.* Neuro-mesenchymal units control ILC2 and obesity via a brain-

- 541 adipose circuit. *Nature* **597**, 410–414 (2021).
- 542 18. Veerakumar, A., Yung, A. R., Liu, Y. & Krasnow, M. A. Molecularly defined circuits for  
543 cardiovascular and cardiopulmonary control. *Nature* **606**, 739–746 (2022).
- 544 19. Rajendran, P. S. *et al.* Identification of peripheral neural circuits that regulate heart  
545 rate using optogenetic and viral vector strategies. *Nat. Commun.* **10**, 1944 (2019).
- 546 20. Mach, D. B. *et al.* Origins of skeletal pain: sensory and sympathetic innervation of the  
547 mouse femur. *Neuroscience* **113**, 155–166 (2002).
- 548 21. Dorey, T. W., Jansen, H. J., Moghtadaei, M., Jamieson, K. L. & Rose, R. A. Impacts of  
549 frailty on heart rate variability in aging mice: Roles of the autonomic nervous system  
550 and sinoatrial node. *Heart Rhythm* **18**, 1999–2008 (2021).
- 551 22. von Borell, E. *et al.* Heart rate variability as a measure of autonomic regulation of  
552 cardiac activity for assessing stress and welfare in farm animals -- a review. *Physiol.*  
553 *Behav.* **92**, 293–316 (2007).
- 554 23. Carulli, D., de Winter, F. & Verhaagen, J. Semaphorins in Adult Nervous System  
555 Plasticity and Disease. *Front. Synaptic Neurosci.* **13**, 672891 (2021).
- 556 24. Brose, K. *et al.* Slit proteins bind Robo receptors and have an evolutionarily conserved  
557 role in repulsive axon guidance. *Cell* **96**, 795–806 (1999).
- 558 25. Dupin, I., Lokmane, L., Dahan, M., Garel, S. & Studer, V. Subrepellent doses of Slit1  
559 promote Netrin-1 chemotactic responses in subsets of axons. *Neural Dev.* **10**, 5  
560 (2015).
- 561 26. Rezaeepoor, M. *et al.* Semaphorin-3A as An Immune Modulator Is Suppressed by  
562 MicroRNA-145-5p. *Cell J.* **20**, 113–119 (2018).
- 563 27. Kiss, T. *et al.* Single-cell RNA sequencing identifies senescent cerebrovascular  
564 endothelial cells in the aged mouse brain. *GeroScience* **42**, 429–444 (2020).
- 565 28. Vidal, R. *et al.* Transcriptional heterogeneity of fibroblasts is a hallmark of the aging  
566 heart. *JCI insight* **4**, e131092 (2019).
- 567 29. Trembinski, D. J. *et al.* Aging-regulated anti-apoptotic long non-coding RNA Sarrah  
568 augments recovery from acute myocardial infarction. *Nat. Commun.* **11**, 2039 (2020).
- 569 30. Manakanatas, C. *et al.* Endothelial and systemic upregulation of miR-34a-5p fine-  
570 tunes senescence in progeria. *Aging (Albany, NY)*. **14**, 195–224 (2022).
- 571 31. Owens, W. A., Walaszczyk, A., Spyridopoulos, I., Dookun, E. & Richardson, G. D.  
572 Senescence and senolytics in cardiovascular disease: Promise and potential pitfalls.  
573 *Mech. Ageing Dev.* **198**, 111540 (2021).
- 574 32. Zhu, Y. *et al.* The Achilles' heel of senescent cells: from transcriptome to senolytic  
575 drugs. *Aging Cell* **14**, 644–658 (2015).
- 576 33. Ziegler, K. A. *et al.* Local sympathetic denervation attenuates myocardial inflammation  
577 and improves cardiac function after myocardial infarction in mice. *Cardiovasc. Res.*

- 578           **114**, 291–299 (2018).
- 579   34.   Godinho-Silva, C., Cardoso, F. & Veiga-Fernandes, H. Neuro-Immune Cell Units: A  
580       New Paradigm in Physiology. *Annu. Rev. Immunol.* **37**, 19–46 (2019).
- 581   35.   Boettger, T. *et al.* Acquisition of the contractile phenotype by murine arterial smooth  
582       muscle cells depends on the Mir143/145 gene cluster. *J. Clin. Invest.* **119**, 2634–2647  
583       (2009).
- 584   36.   Liu, Y. *et al.* The telomerase reverse transcriptase is limiting and necessary for  
585       telomerase function in vivo. *Curr. Biol.* **10**, 1459–1462 (2000).
- 586   37.   Bär, C. *et al.* Telomerase gene therapy rescues telomere length, bone marrow aplasia,  
587       and survival in mice with aplastic anemia. *Blood* **127**, 1770–1779 (2016).
- 588   38.   Xu, M. *et al.* Senolytics improve physical function and increase lifespan in old age.  
589       *Nat. Med.* **24**, 1246–1256 (2018).
- 590   39.   Bell, R. M., Mocanu, M. M. & Yellon, D. M. Retrograde heart perfusion: the  
591       Langendorff technique of isolated heart perfusion. *J. Mol. Cell. Cardiol.* **50**, 940–950  
592       (2011).
- 593   40.   Clasen, L. *et al.* A modified approach for programmed electrical stimulation in mice:  
594       Inducibility of ventricular arrhythmias. *PLoS One* **13**, e0201910 (2018).
- 595   41.   Nicin, L. *et al.* A human cell atlas of the pressure-induced hypertrophic heart. *Nat.*  
596       *Cardiovasc. Res.* **1**, 174–185 (2022).
- 597   42.   Boon, R. A. *et al.* MicroRNA-34a regulates cardiac ageing and function. *Nature* **495**,  
598       107–110 (2013).
- 599
- 600

**Figure 1**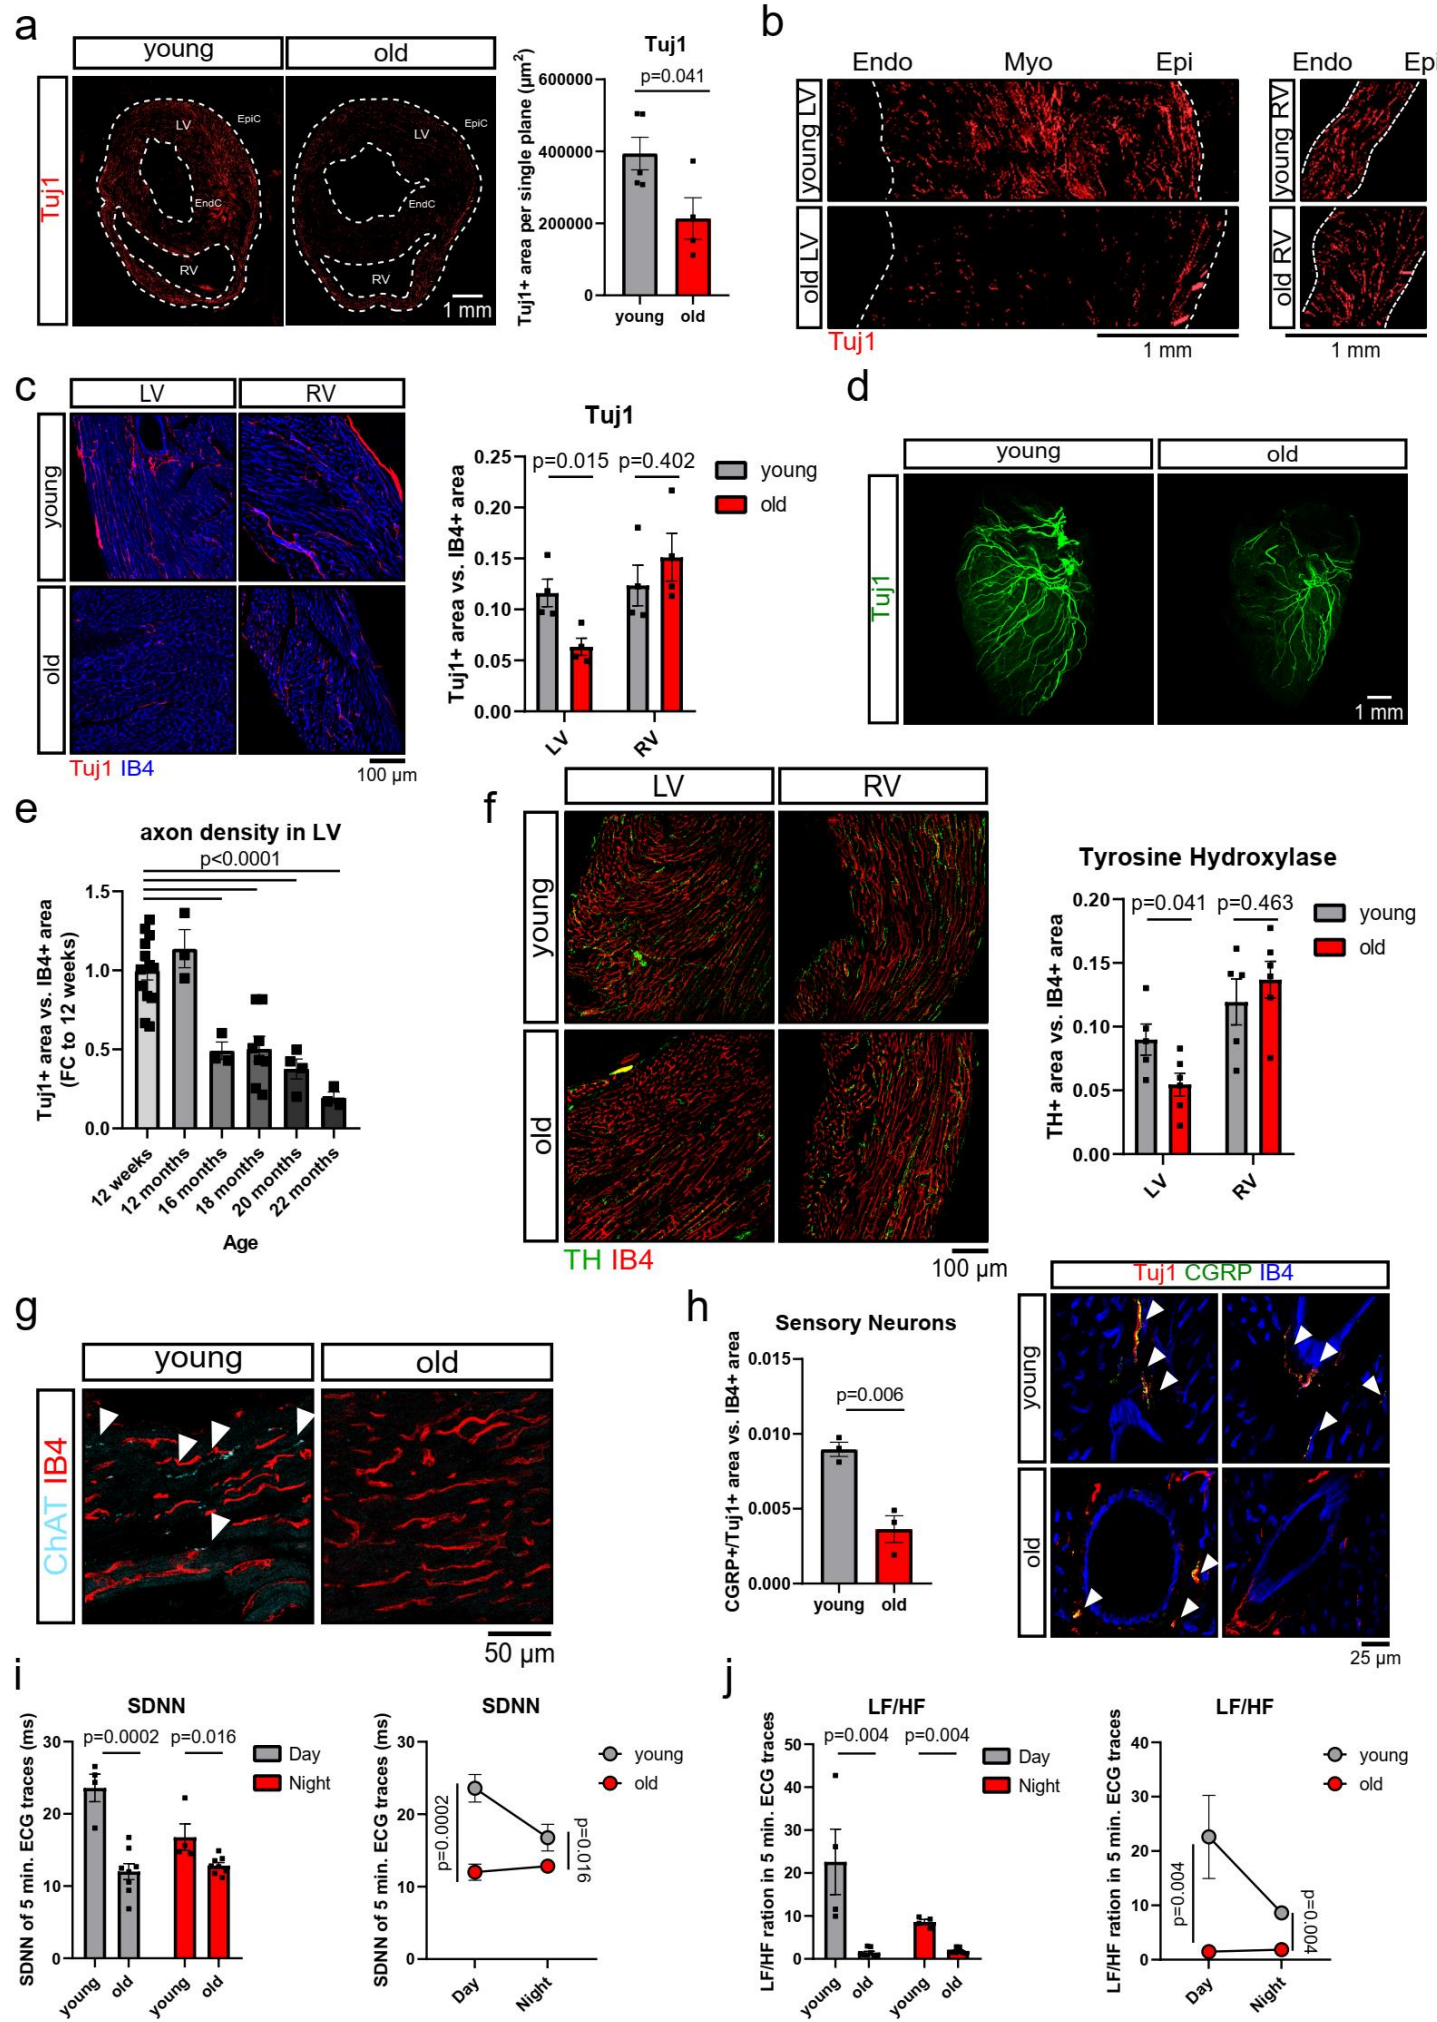



**Fig. 1 Aging impairs cardiac innervation.** **a** Tile scan of male 12-weeks young vs. 18-months old mouse heart cross-sections (LV: left ventricle; RV: right ventricle). Autonomic nervous system is shown by Tuj1 staining (red) and was quantified by Tuj1-positive area per single Z-plane (young: n=5 vs. old: n=4). **b** Zoom-in of the left and right ventricular wall shown in panel a. **c** Quantification of Tuj1-positive area vs. IB4-positive area in young (12 weeks) vs. old (20 months) left (LV) and right ventricles (RV). Innervation was assessed by Tuj1 (red) and normalized to IB4 (blue) (n=4). **d** Whole mount Tuj1 (green) staining of male young (12 weeks) and old (18 months) mouse hearts. One representative image per group is shown (n=3). **e** Left-ventricular innervation (Tuj1=green) vs. IB4 (red) at 12 weeks, 12 months, 16 months, 18 months, 20 months and 22 months of age (n=12 vs. n=3, n=3, n=8, n=4, n=3). **f** Tyrosine hydroxylase (TH) staining (green) vs. IB4 (red) in male young (12 weeks) vs. old (18 and 20 months) left and right ventricles (young n=5 vs. old n=6). **g** Representative choline acetyltransferase (ChAT=cyano) staining in young (12 weeks) vs. old (18 months) old mouse hearts (cardiac base). IB4 (red) served as counter stain (n=3). **h** Immunofluorescence staining of sensory nerves (CGRP=green and Tuj1=red, indicated by white arrow heads) vs. IB4 (blue) in young (12 weeks) vs. old (18 and 20 months) mouse hearts (n=3). **i, j** Heart rate variability was assessed by telemetric ECG recordings in young (15 weeks) vs. old (19 months) mice. Heart rate variability was determined as standard deviation of normal RR-Intervals (SDNN; i) and low frequency to high frequency ratio (LF/HF; j) in ECG traces of 5 minutes at day and night (n=4 vs. n=8). Data are shown as mean and error bars indicate the standard error of the mean (SEM). After passing normality test, statistical power of young vs. old mice was assessed using the unpaired, two-tailed t-test (a, c, f, h, i, j). To compare multiple groups, an ordinary one-way ANOVA test with a post-hoc Tukey test was used (e).



**Figure 2**

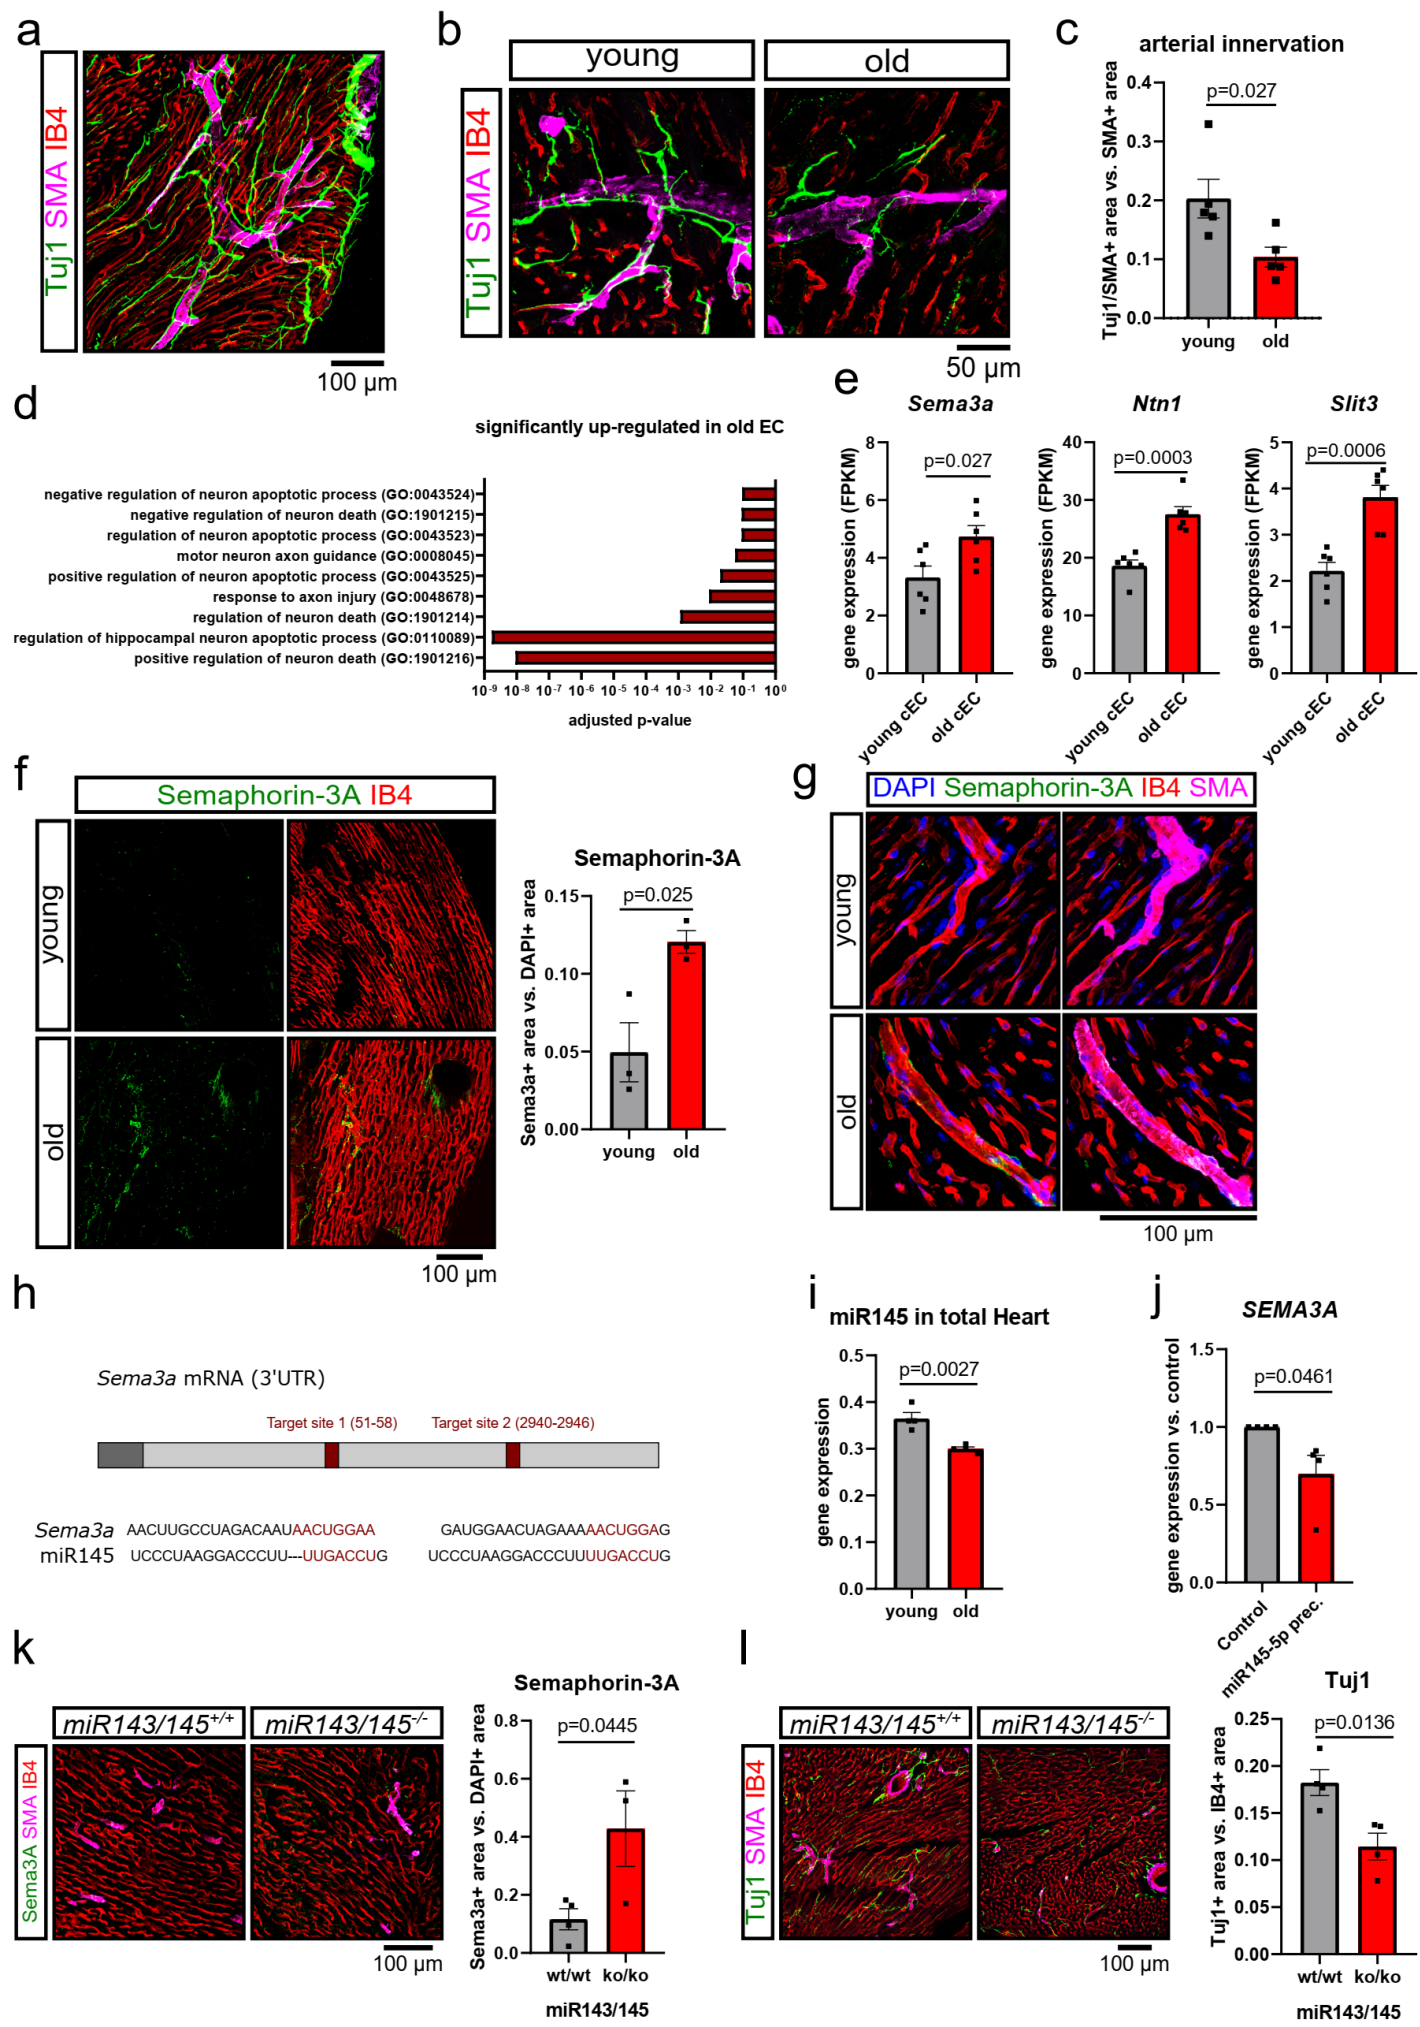

**Fig. 2 Aging impairs the cardiac neurovascular interface.** **a** Representative image of the neurovascular alignment in a young (12 weeks) male mouse heart. Nervous fibers are assessed by Tuj1 staining (green), endothelial cells by IB4 (red) and arterioles by smooth muscle actinin (SMA, magenta) staining. **b, c** Neurovascular alignment in male young (12 weeks) vs. old (18 months) left ventricles as assessed by Tuj1 (green) and SMA (magenta) double positive areas. IB4 (red) served as counter stain (n=5). **d** Gene ontology (GO) analysis of nervous system related GO terms in bulk RNA sequencing data of isolated cardiac endothelial cells from young (12 weeks) vs. old (20 months) mice (n=6). GO term analysis were performed using the online platform *Enrichr*. **e** Gene expression of *Sema3a*, *Ntn1* and *Slit3* mRNA (FPKM) in young (12 weeks) vs. old (20 months) isolated cardiac mouse endothelial cells (n=6). **f, g** Immunofluorescence staining of Semaphorin-3A (green) and IB4 (red) male in young (12 weeks) and old (20 months) left ventricles. An overview image including the quantification is shown in panel f while panel g shows representative high magnification images (n=3). **h** Schematic representation of miR145 binding-sites described in the *Sema3a* 3'UTR<sup>26</sup>. **i** Expression of miR-145 in total hearts from young and old mice as assessed via microarray (n=4). **j** Relative *Sema3a* mRNA expression in human umbilical cord vein endothelial cells (HUVEC) upon miR145-5p precursor transfection (n=4). **k** Immunofluorescence staining of Semaphorin-3A (green) in hearts derived from young (13-14 weeks) male and female miR143/145-knockout mice. SMA (magenta) and IB4 (red) served as control staining (n=4). **l** Immunofluorescence staining of Tuj1 (green) in hearts derived from young (13-14 weeks) male and female miR143/145-knockout mice. SMA (magenta) and IB4 (red) served as control staining (n=4). Data are shown as mean and error bars indicate the standard error of the mean (SEM). After passing normality test, statistical power was assessed using the unpaired, two-tailed t-test.

**Figure 3****a**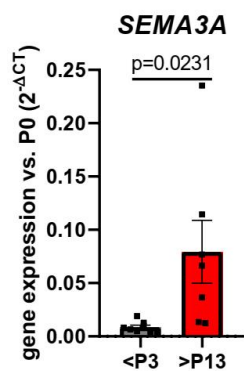**b**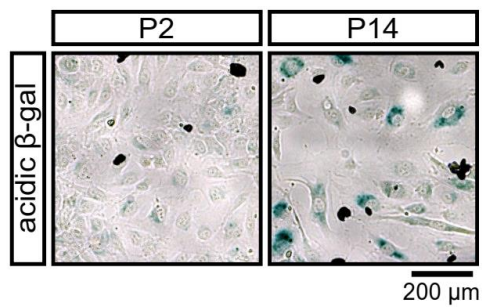**c**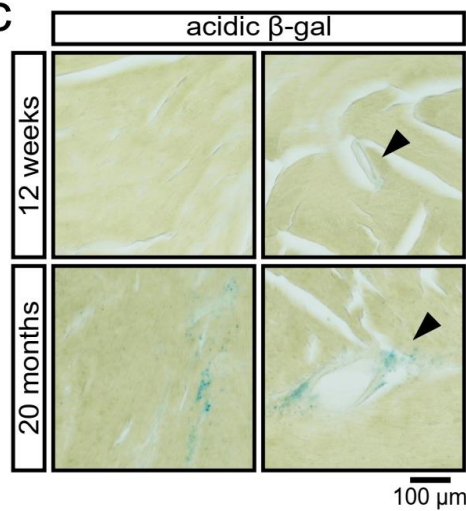**d**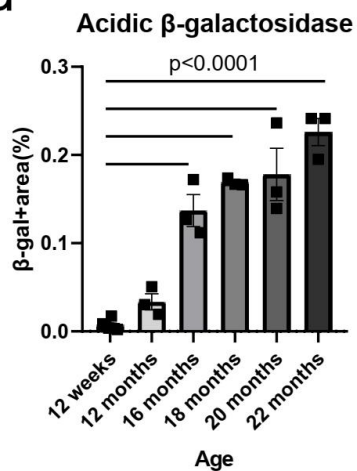**e**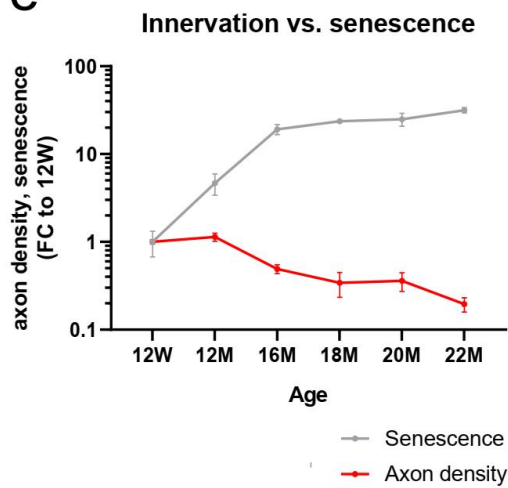**f**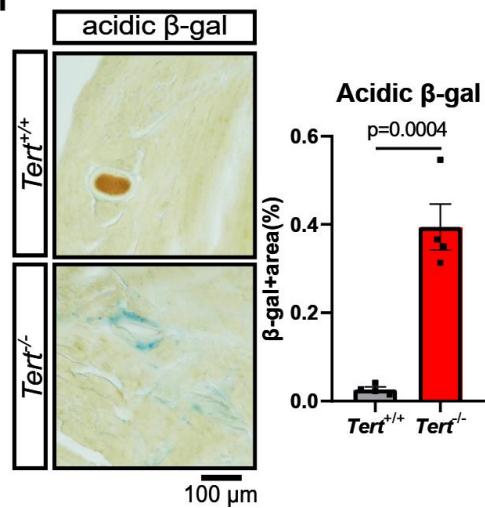**g**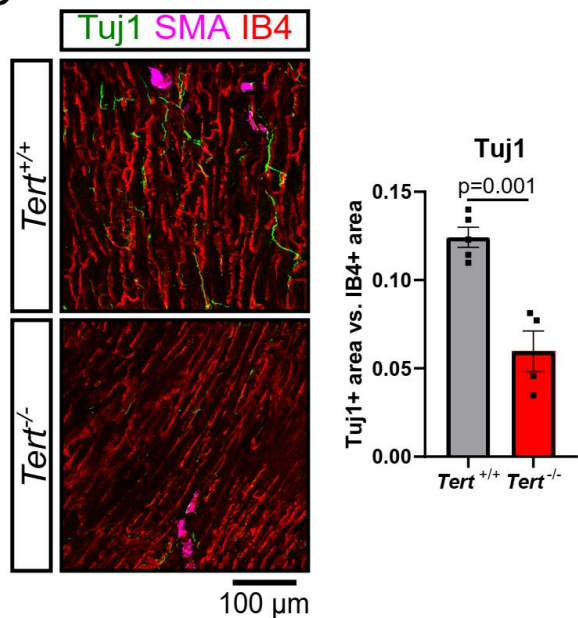**h**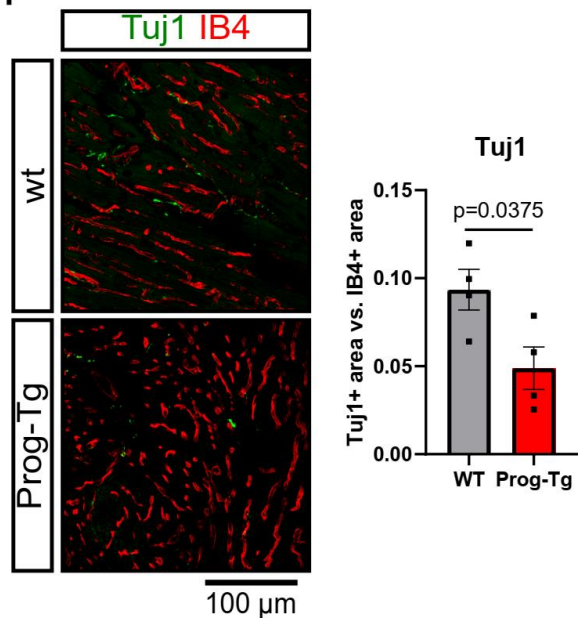

**Fig. 3 Senescence impairs cardiac innervation.** **a** *Sema3a* mRNA expression in short-passage (P2-P3) and long-passage (>P13) HUVEC (n=8 vs. n=7). **b** Representative image of short-passage (P2) and long-passage (P14) HUVEC upon acidic  $\beta$ -galactosidase staining. **c** Representative acidic  $\beta$ -galactosidase stainings on heart sections of male mice at 12 weeks and 20 months old mice (12 weeks: n=6 vs. 20 months: n=3). **d** Quantification of acidic  $\beta$ -galactosidase staining of 12 weeks, 12 months, 16 months, 18 months, 20 months and 22 months of age (12 weeks: n=6 vs. 12 months: n=3, 16 months: n=3, 18 months: n=3, 20 months: n=3, 22 months: n=3). **e** Axon density (Fig. 1e) and acidic  $\beta$ -galactosidase-positive area (Fig. 3c) normed to 12 weeks respectively. **f** Acidic  $\beta$ -galactosidase staining on heart sections of male *Tert*<sup>-/-</sup> (4<sup>th</sup> generation, 10-15 weeks, n=4). **g** Tuj1 staining (green) on heart sections of male *Tert*<sup>-/-</sup> (4<sup>th</sup> generation, 10-15 weeks). IB4 (red) and SMA (magenta) served as counter stain (n=4). **h** Tuj1 staining (green) on heart sections of female and male Prog-Tg mice (28-29 weeks old). IB4 (red) served as counter stain (n=4). Data are shown as mean and error bars indicate the standard error of the mean (SEM). After passing normality test, statistical power was assessed using the unpaired, two-sided t-test.



**Figure 4**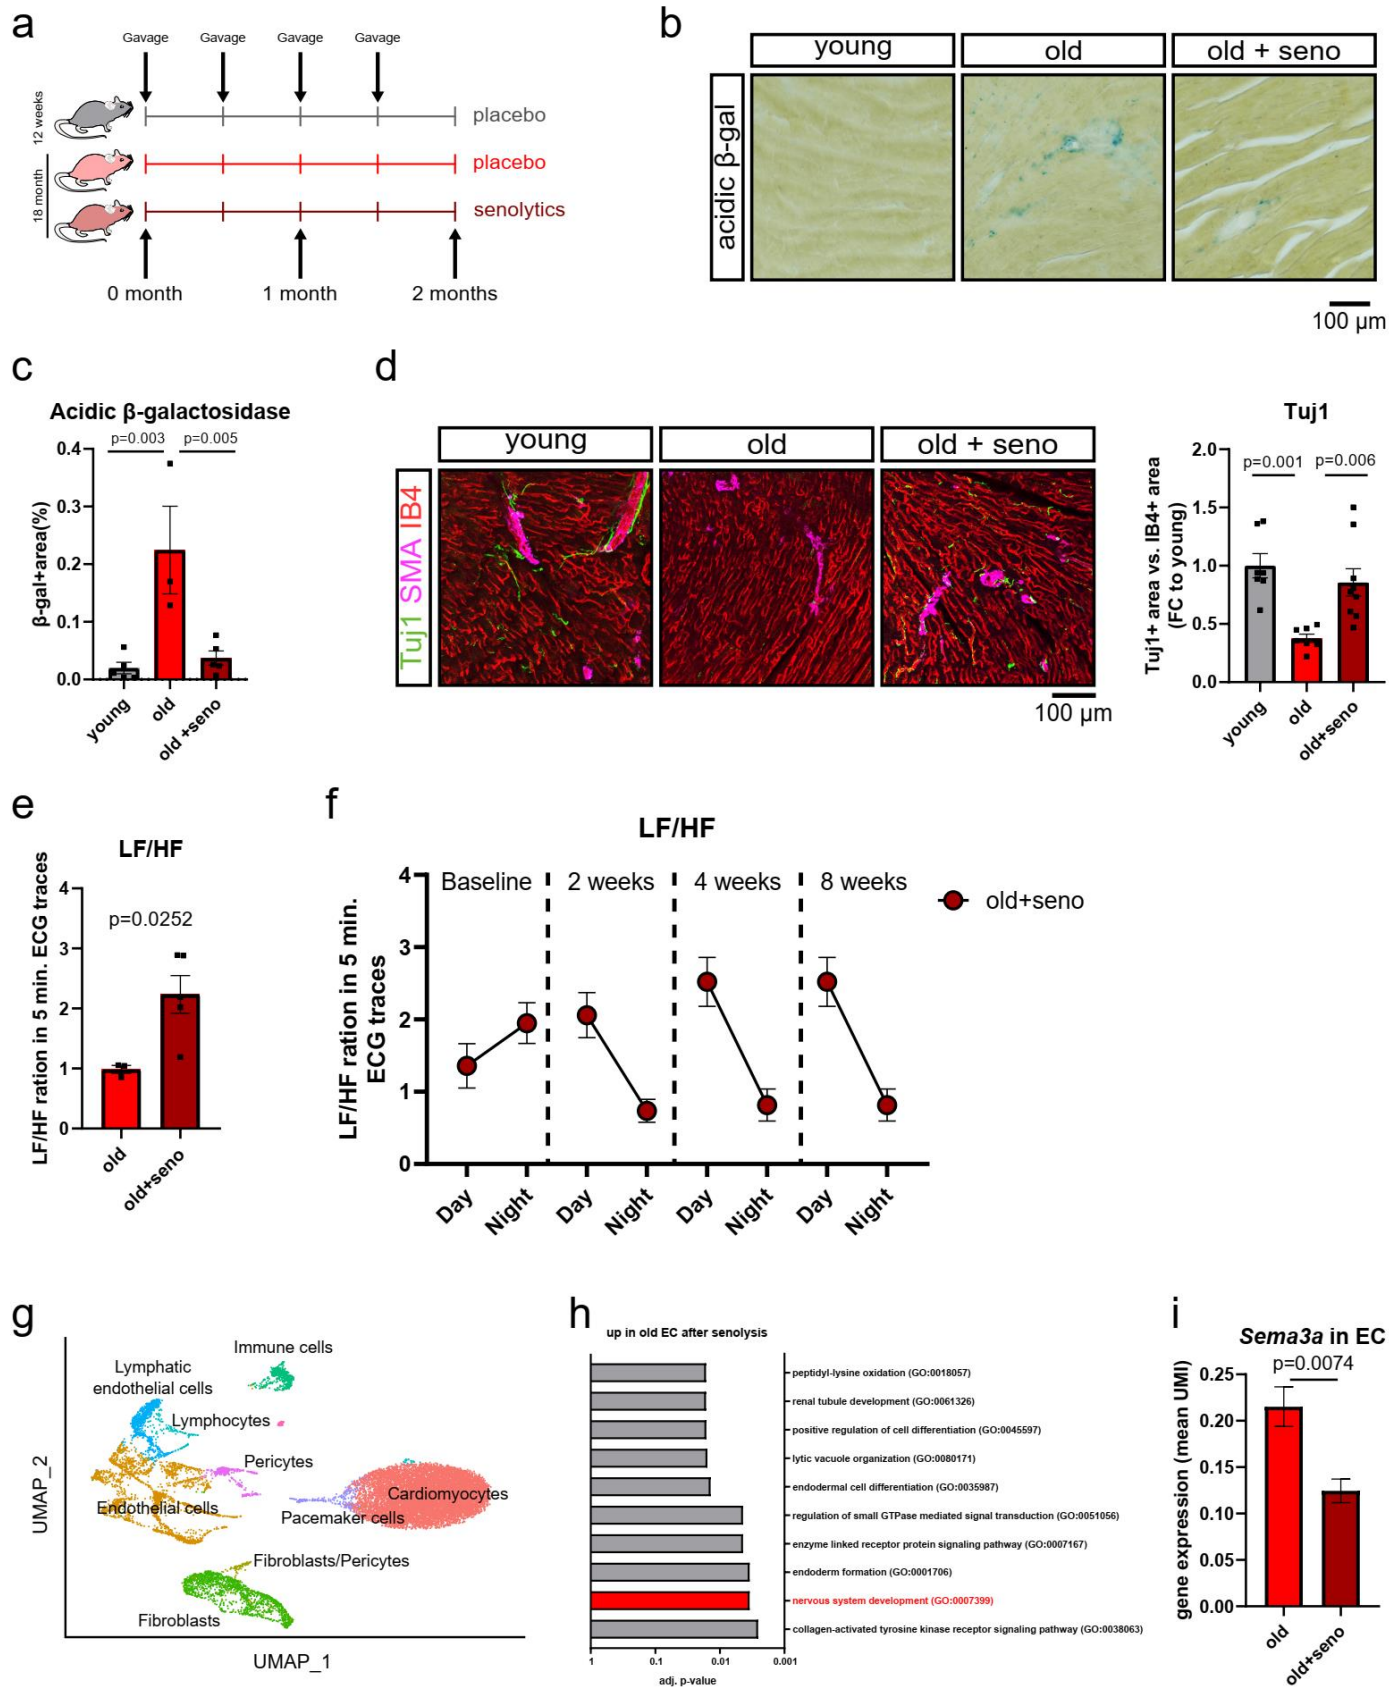

**Fig. 4 Senolysis rescues axon density in aged mice.** **a** Schematic experimental set-up. 18 to 19 months old male mice received a combination of the two senolytics drugs dasatinib and quercetin on three consecutive days, every second week, for a total duration of two months. Young (16 weeks) and old (18 to 19 months) mice receiving the vehicle (placebo) served as control cohorts. **b /c** Acidic  $\beta$ -galactosidase staining on heart sections of male old mice after senolytics treatment vs. heart sections of the respective control groups as described in panel a. Panel c shows the quantification of acidic  $\beta$ -gal positive area (n=5 vs. n=3 vs. n=5). **d** Tuj1 (green), SMA (magenta) and IB4 (red) staining on heart sections of male old mice after senolytics treatment vs. heart sections of the respective control groups as described in panel a (n=7 vs. n=7 vs. n=9). **e** Frequency domain measurement (LF/HF ratio) of 5 min. ECG traces at day time in old mice after two weeks of placebo vs. senolytics treatment (n=3 vs. n=5). **f** Frequency domain measurement (LF/HF ratio) of 5 min. ECG traces at day and night time in old mice before and after 2, 4 and 8 weeks of senolytics treatment (n>5). **g** UMAP visualizing single nuclei RNA sequencing of old male mice after placebo and senolytics treatment (n=3). **h** GO terms analysis of significantly up-regulated genes in endothelial cells upon senolytics treatment. Listed are the top-10 regulated GO terms. **i** *Sema3a* mRNA (mean UMI expression) expression in the endothelial, pericyte and fibroblast clusters of the single nuclei RNA sequencing data shown in panel f. Data are shown as mean and error bars indicate the standard error of the mean (SEM). After passing normality test, statistical power was assessed using the unpaired, two-tailed t-test (d). For comparing multiple groups an ordinary one-way ANOVA with a post-hoc Tukey test was used (b, c). To assess the statistical power of single nuclei RNA sequencing data, a cluster t-test was used (h).



## Suppl. Fig. 1

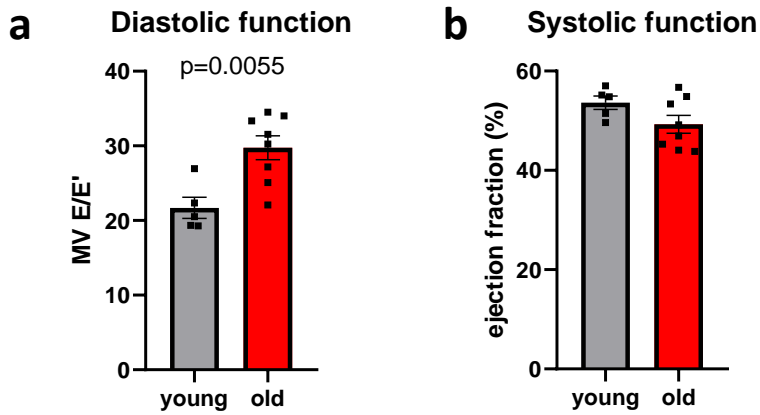

**Suppl. Fig. 1 Echocardiography in young vs. old mice.** **a** Diastolic function was assessed as MV E/E' in male young (12 weeks) vs. old (18 months) mice (n=5 vs. n=8). **b** Systolic function was determined by ejection fraction (EF %) in male young (12 weeks) vs. old (18 months) mice (n=5 vs. n=8). Data are shown as mean and error bars indicate the standard error of the mean (SEM). After passing normality test, statistical power was assessed using the unpaired, two-tailed t-test.

## Suppl. Fig. 2

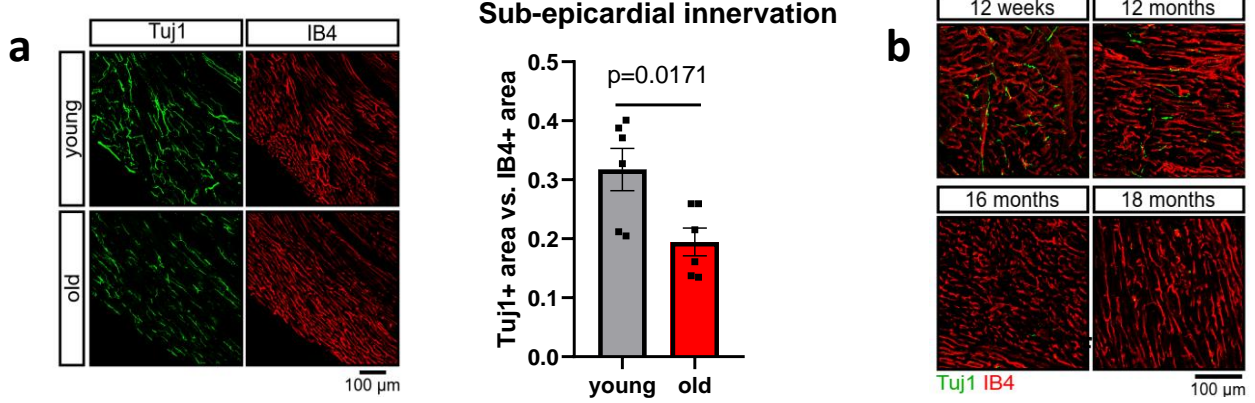

**Suppl. Fig. 2 Axon density in aged left ventricles.** **a** Histological assessment of the sub-epicardial innervation in left ventricles of young (12 weeks) vs. old (18 months) mice. Axon density was assessed via Tuj1 (green) staining and normalized to IB4 (red) ( $n=6$ ). **b** Left-ventricular innervation (Tuj1=green) vs. IB4 (red) at 12 weeks, 12 months, 16 months, 18 months, 20 months and 22 months of age ( $n=12$  vs.  $n=3$ ,  $n=3$ ,  $n=8$ ,  $n=4$ ,  $n=3$ ).

## Suppl. Fig. 3

a

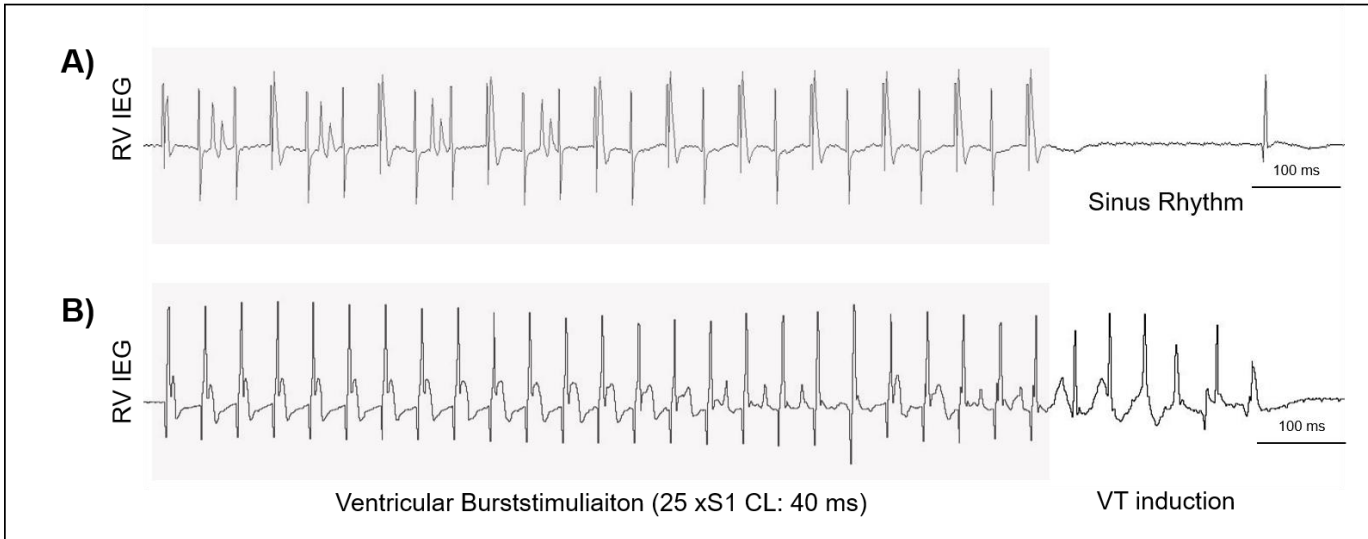

b

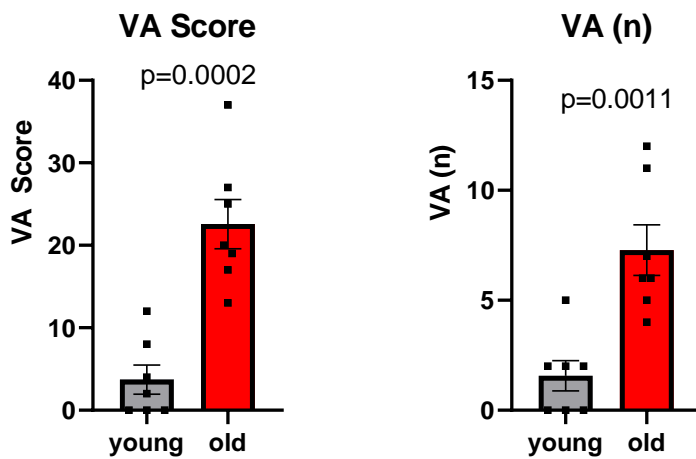

**Suppl. Fig. 3 Susceptibility to ventricular arrhythmias is increased in aged hearts a** Exemplary right ventricular intracardiac electrograms (RV IEG) of ventricular burststimulation (VBS) maneuvers (grey highlighted) in a young (A) and aged (B) heart ex vivo. In the young heart the VBS does not result in continuous ventricular arrhythmia whereas VBS induces a ventricular tachycardia (VT) in the aged heart. **b** Quantification of ventricular arrhythmias (n=7). Data are shown as mean and standard errors indicate SEM. Statistical power was assessed using unpaired, two-tailed t-test.

## Suppl. Fig. 4

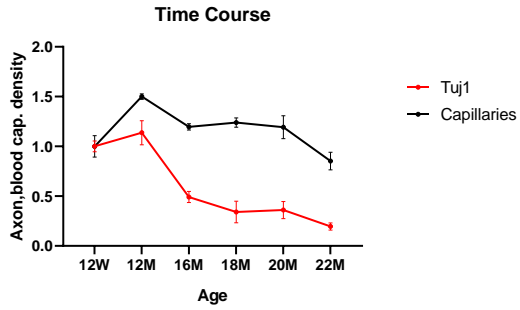

**Suppl. Fig. 4 Time course study of axon and capillary density.** Axon (Tuj1) and capillary density (IB4) in left ventricles of mice at 12 weeks, 12 months, 16 months, 18 months, 20 months and 22 months of age (n=3).

## Suppl. Fig. 5

### a Senescent Score in old cells

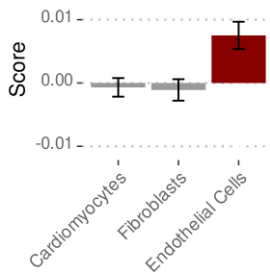

### b

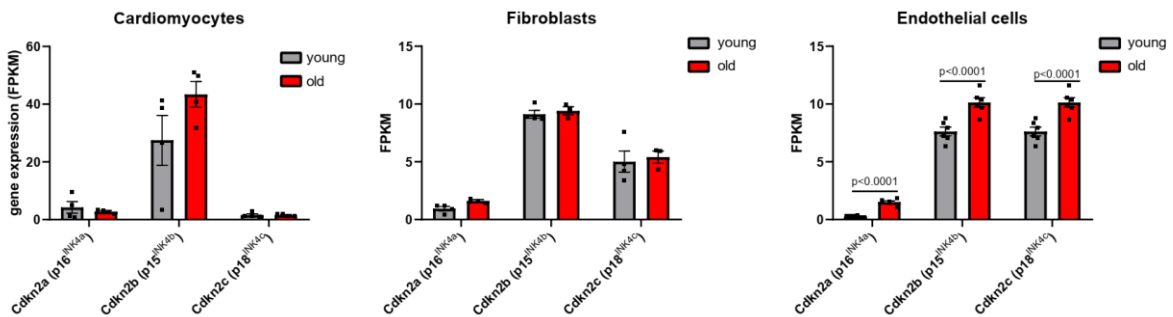

**Suppl. Fig. 5 Identifying cellular senescence in old cardiac cells.** **a** Senescent score after Kiss et al.,<sup>27</sup> applied on clusters of cardiomyocytes, fibroblast and endothelial cell derived from published single nuclei RNA sequencing data from young vs. old mouse hearts<sup>28</sup> (n=3). **b** Senescence marker gene expression in bulk RNA sequencing data of isolated cardiomyocytes<sup>29</sup> (n=4), fibroblasts<sup>28</sup>(n=4) and endothelial cells (n=6). Data are shown as mean and error bars indicate the standard error of the mean (SEM). After passing normality test, statistical power was assessed using the unpaired, two-tailed t-test.

# Suppl. Fig. 6

**a**

**Young+placebo**  
LF/HF

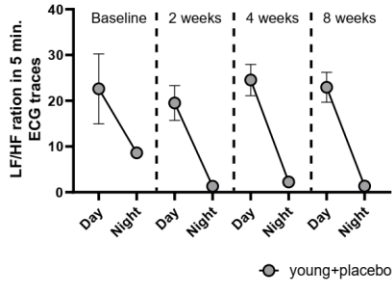

**Old+placebo**  
LF/HF

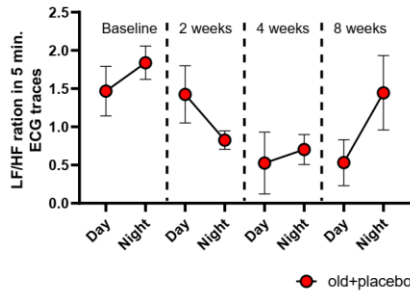

**Old+seno**  
LF/HF

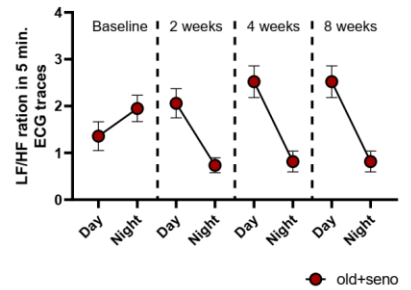

○ young+placebo

● old+placebo

● old+seno

**b**

**LF/HF**  
**young+placebo**

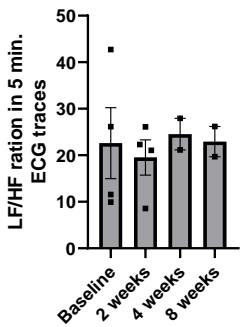

**LF/HF**  
**old+placebo**

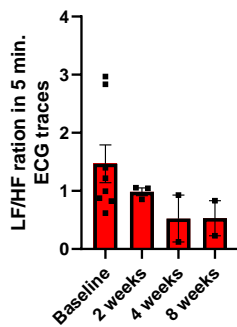

**LF/HF**  
**old+seno**

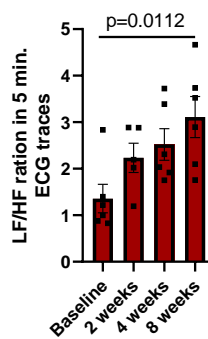

**Suppl. Fig. 6 Heart rate variability analyses in old mice upon senolysis. a/b** Frequency domain measurement (LF/HF ratio) of 5 min. ECG traces at day and night time (a) and statistical analysis of LF/HF ratio at day time only (b). Young placebo (16 weeks), old placebo (19 months) and old senolytics (19 months) mice were analyzed before and after 2 (young-placebo: n=4; old-placebo n=3; old-senolytics: n=5), 4 (young-placebo: n=2; old-placebo n=2; old-senolytics: n=6) and 8 weeks (young-placebo: n=2; old-placebo n=2; old-senolytics: n=6) of treatment. Data are shown as mean and error bars indicate the standard error of the mean (SEM). After passing normality test, statistical power was assessed using an ordinary one-way ANOVA with a post-hoc Tukey test was used (b, old+senolytics).



## Suppl. Fig. 7

**a**

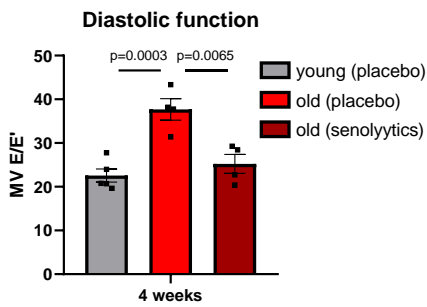

**b**

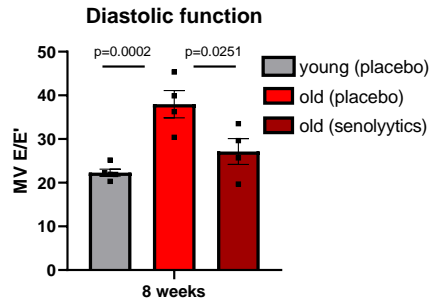

**Suppl. Fig. 7 Echocardiography analyses in young and old mice upon senolysis.** **a** Diastolic function was assessed as MV E/E' in male young (12 weeks) vs. old (18 months) mice after 4 weeks of placebo / senolytics treatment (n=5 vs. n=4 vs. n=4). **b** Diastolic function was assessed as MV E/E' in male young (12 weeks) vs. old (18 months) mice after 8 weeks of placebo or senolytics treatment (n=5 vs. n=4 vs. n=4). Data are shown as mean and error bars indicate the standard error of the mean (SEM). After passing normality test, statistical power was assessed using an ordinary one-way ANOVA with a post-hoc Tukey test was used.

## Suppl. Fig. 8

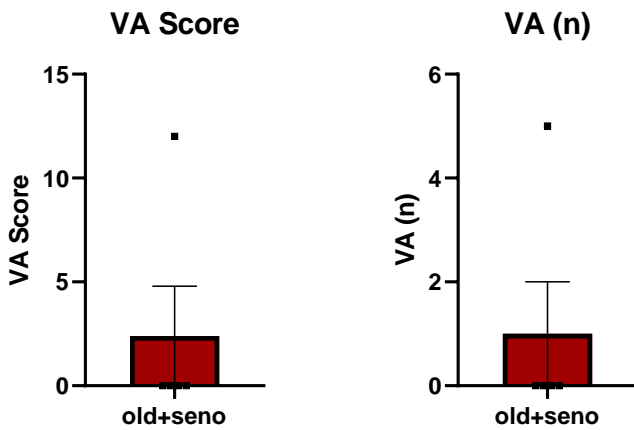

**Suppl. Fig. 8 Susceptibility to ventricular arrhythmias is decreased in aged hearts after senolysis.** Quantification of ventricular arrhythmias in old hearts, two months after senolytics drug administration (n=5).

## Suppl. Fig. 9

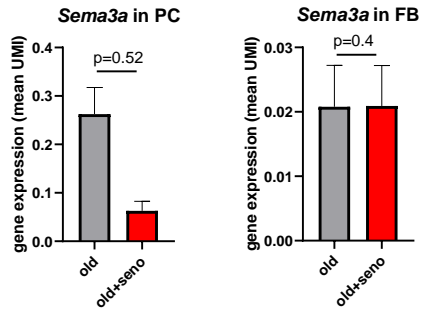

**Suppl. Fig. 9 Sema3a expression on single nuclei level.** Mean UMI expression showing *Sema3a* expression in pericytes (PC) and fibroblasts (FB) in old vs. old senolytics mouse hearts (n=3). Data are expressed as mean and error bars indicate standard error of the mean. Statistical power was assessed using a clustered t-test.

**Suppl. Tab. 1:** Top 25 GO terms which are up- and down-regulated in endothelial cells (EC), lymphatic endothelial cells (LymphEC), fibroblasts (FB) and pericytes (PC) in aged hearts upon senolytics treatment. Data are received from snRBA seq.

|                                                                    | <b>Term</b>                                                                     | <b>P-value</b> | <b>Adj. P-value</b> |
|--------------------------------------------------------------------|---------------------------------------------------------------------------------|----------------|---------------------|
| <b>GO terms, up-regulated in aged cardiac EC upon senolytics</b>   | extracellular matrix organization (GO:0030198)                                  | 2,71E-05       | 6,50E-02            |
|                                                                    | extracellular structure organization (GO:0043062)                               | 6,50E-06       | 6,50E-02            |
|                                                                    | external encapsulating structure organization (GO:0045229)                      | 7,59E-05       | 6,50E-02            |
|                                                                    | collagen fibril organization (GO:0030199)                                       | 7,09E-01       | 4,55E+02            |
|                                                                    | supramolecular fiber organization (GO:0097435)                                  | 2,94E+02       | 1,51E+06            |
|                                                                    | collagen-activated signaling pathway (GO:0038065)                               | 7,20E+08       | 2,79E+11            |
|                                                                    | transmembrane receptor protein tyrosine kinase signaling pathway (GO:0007169)   | 7,60E+08       | 2,79E+11            |
|                                                                    | negative regulation of multicellular organismal process (GO:0051241)            | 2,31E+09       | 7,42E+11            |
|                                                                    | collagen-activated tyrosine kinase receptor signaling pathway (GO:0038063)      | 8,99E+09       | 2,57E-03            |
|                                                                    | endoderm formation (GO:0001706)                                                 | 1,48E+11       | 3,47E-03            |
|                                                                    | nervous system development (GO:0007399)                                         | 1,49E+11       | 3,47E-03            |
|                                                                    | enzyme linked receptor protein signaling pathway (GO:0007167)                   | 2,06E+11       | 4,39E-03            |
|                                                                    | regulation of small GTPase mediated signal transduction (GO:0051056)            | 2,22E+10       | 4,39E-03            |
|                                                                    | endodermal cell differentiation (GO:0035987)                                    | 7,63E+10       | 1,40E-02            |
|                                                                    | lytic vacuole organization (GO:0080171)                                         | 9,14E+10       | 1,56E-02            |
|                                                                    | positive regulation of cell differentiation (GO:0045597)                        | 1,01E+12       | 1,63E-02            |
|                                                                    | renal tubule development (GO:0061326)                                           | 1,15E+12       | 1,64E-02            |
|                                                                    | peptidyl-lysine oxidation (GO:0018057)                                          | 1,15E+12       | 1,64E-02            |
|                                                                    | actin filament organization (GO:0007015)                                        | 2,03E+12       | 2,64E-02            |
|                                                                    | lysosome organization (GO:0007040)                                              | 2,07E+11       | 2,64E-02            |
|                                                                    | aorta development (GO:0035904)                                                  | 2,26E+11       | 2,64E-02            |
|                                                                    | retinal ganglion cell axon guidance (GO:0031290)                                | 2,27E+11       | 2,64E-02            |
|                                                                    | regulation of actin cytoskeleton organization (GO:0032956)                      | 2,38E+12       | 2,66E-02            |
|                                                                    | positive regulation of phosphorylation (GO:0042327)                             | 2,57E+12       | 2,75E-02            |
|                                                                    | inflammatory response (GO:0006954)                                              | 2,86E+10       | 2,94E-02            |
| <b>GO terms, down-regulated in aged cardiac EC upon senolytics</b> | phosphorylation (GO:0016310)                                                    | 3,86E+09       | 3,37E-03            |
|                                                                    | negative regulation of cellular macromolecule biosynthetic process (GO:2000113) | 5,71E+10       | 2,49E-02            |
|                                                                    | protein phosphorylation (GO:0006468)                                            | 1,46E+12       | 3,16E-02            |
|                                                                    | entrainment of circadian clock by photoperiod (GO:0043153)                      | 1,62E+12       | 3,16E-02            |
|                                                                    | photoperiodism (GO:0009648)                                                     | 1,81E+12       | 3,16E-02            |
|                                                                    | positive regulation of apoptotic process (GO:0043065)                           | 2,24E+12       | 3,26E-02            |
|                                                                    | cellular response to interleukin-21 (GO:0098757)                                | 4,25E+11       | 4,64E-02            |
|                                                                    | interleukin-21-mediated signaling pathway (GO:0038114)                          | 4,25E+11       | 4,64E-02            |
|                                                                    | cellular response to interleukin-9 (GO:0071355)                                 | 5,45E+10       | 4,76E-02            |
| interleukin-9-mediated signaling pathway (GO:0038113)              | 5,45E+10                                                                        | 4,76E-02       |                     |

|                                                                |                                                                                           |          |          |
|----------------------------------------------------------------|-------------------------------------------------------------------------------------------|----------|----------|
|                                                                | cellular response to cytokine stimulus (GO:0071345)                                       | 6,26E+11 | 4,97E-02 |
|                                                                | interleukin-35-mediated signaling pathway (GO:0070757)                                    | 8,28E+11 | 5,56E-02 |
|                                                                | positive regulation of posttranscriptional gene silencing (GO:0060148)                    | 8,28E+11 | 5,56E-02 |
|                                                                | cellular response to mechanical stimulus (GO:0071260)                                     | 9,59E+11 | 5,98E-02 |
|                                                                | positive regulation of fat cell differentiation (GO:0045600)                              | 1,08E-03 | 6,00E-02 |
|                                                                | cellular response to interleukin-15 (GO:0071350)                                          | 1,17E-03 | 6,00E-02 |
|                                                                | interleukin-15-mediated signaling pathway (GO:0035723)                                    | 1,17E-03 | 6,00E-02 |
|                                                                | growth hormone receptor signaling pathway via JAK-STAT (GO:0060397)                       | 1,36E-03 | 6,59E-02 |
|                                                                | cellular response to estrogen stimulus (GO:0071391)                                       | 1,56E-03 | 6,83E-02 |
|                                                                | interleukin-27-mediated signaling pathway (GO:0070106)                                    | 1,56E-03 | 6,83E-02 |
|                                                                | negative regulation of gene expression (GO:0010629)                                       | 1,72E-03 | 7,01E-02 |
|                                                                | regulation of rRNA processing (GO:2000232)                                                | 1,78E-03 | 7,01E-02 |
|                                                                | positive regulation of cytokine production involved in inflammatory response (GO:1900017) | 2,02E-03 | 7,01E-02 |
|                                                                | regulation of protein-containing complex disassembly (GO:0043244)                         | 2,26E-03 | 7,01E-02 |
|                                                                | positive regulation of cell death (GO:0010942)                                            | 2,27E-03 | 7,01E-02 |
| GO terms, up-regulated in aged cardiac lymphEC upon senolytics | glycolipid metabolic process (GO:0006664)                                                 | 5,67E+10 | 1,18E-01 |
|                                                                | regulation of macrophage migration (GO:1905521)                                           | 8,56E+10 | 1,18E-01 |
|                                                                | actin filament-based transport (GO:0099515)                                               | 1,73E+12 | 1,42E-01 |
|                                                                | regulation of cell migration (GO:0030334)                                                 | 2,05E+12 | 1,42E-01 |
|                                                                | positive regulation of cell migration (GO:0030335)                                        | 2,73E+11 | 1,42E-01 |
|                                                                | negative regulation of actin filament depolymerization (GO:0030835)                       | 3,35E+11 | 1,42E-01 |
|                                                                | positive regulation of signal transduction (GO:0009967)                                   | 3,65E+12 | 1,42E-01 |
|                                                                | positive regulation of endothelial cell migration (GO:0010595)                            | 4,11E+12 | 1,42E-01 |
|                                                                | endothelial cell migration (GO:0043542)                                                   | 4,87E+11 | 1,49E-01 |
|                                                                | positive regulation of cell motility (GO:2000147)                                         | 7,46E+11 | 2,06E-01 |
|                                                                | regulation of Cdc42 protein signal transduction (GO:0032489)                              | 9,03E+11 | 2,25E-01 |
|                                                                | endothelial cell proliferation (GO:0001935)                                               | 1,06E-03 | 2,25E-01 |
|                                                                | T cell migration (GO:0072678)                                                             | 1,06E-03 | 2,25E-01 |
|                                                                | regulation of small GTPase mediated signal transduction (GO:0051056)                      | 1,22E-03 | 2,40E-01 |
|                                                                | vesicle transport along actin filament (GO:0030050)                                       | 1,31E-03 | 2,42E-01 |
|                                                                | positive regulation of epithelial cell proliferation (GO:0050679)                         | 1,47E-03 | 2,54E-01 |
|                                                                | ganglioside metabolic process (GO:0001573)                                                | 1,60E-03 | 2,61E-01 |
|                                                                | cellular response to vascular endothelial growth factor stimulus (GO:0035924)             | 1,78E-03 | 2,67E-01 |
|                                                                | regulation of lipid biosynthetic process (GO:0046890)                                     | 2,04E-03 | 2,67E-01 |
|                                                                | semaphorin-plexin signaling pathway (GO:0071526)                                          | 2,04E-03 | 2,67E-01 |
|                                                                | negative regulation of BMP signaling pathway (GO:0030514)                                 | 2,28E-03 | 2,67E-01 |
|                                                                | regulation of endothelial cell migration (GO:0010594)                                     | 2,29E-03 | 2,67E-01 |
|                                                                | negative regulation of voltage-gated potassium channel activity (GO:1903817)              | 2,51E-03 | 2,67E-01 |

|                                                                  |                                                                                                    |          |          |
|------------------------------------------------------------------|----------------------------------------------------------------------------------------------------|----------|----------|
|                                                                  | phagosome maturation (GO:0090382)                                                                  | 2,62E-03 | 2,67E-01 |
|                                                                  | regulation of actin cytoskeleton organization (GO:0032956)                                         | 2,64E-03 | 2,67E-01 |
| GO terms, down-regulated in aged cardiac lymphEC upon senolytics | ncRNA processing (GO:0034470)                                                                      | 1,55E+12 | 1,00E-01 |
|                                                                  | positive regulation of RNA polymerase II transcription preinitiation complex assembly (GO:0045899) | 3,28E+12 | 1,00E-01 |
|                                                                  | regulation of G2/M transition of mitotic cell cycle (GO:0010389)                                   | 3,29E+11 | 1,00E-01 |
|                                                                  | rRNA metabolic process (GO:0016072)                                                                | 4,83E+12 | 1,06E-01 |
|                                                                  | rRNA processing (GO:0006364)                                                                       | 6,51E+11 | 1,06E-01 |
|                                                                  | regulation of RNA polymerase II transcription preinitiation complex assembly (GO:0045898)          | 6,96E+11 | 1,06E-01 |
|                                                                  | regulation of phosphatidylinositol 3-kinase signaling (GO:0014066)                                 | 8,65E+11 | 1,13E-01 |
|                                                                  | ribosome biogenesis (GO:0042254)                                                                   | 1,04E-03 | 1,18E-01 |
|                                                                  | pteridine-containing compound metabolic process (GO:0042558)                                       | 1,20E-03 | 1,21E-01 |
|                                                                  | response to UV-A (GO:0070141)                                                                      | 1,39E-03 | 1,27E-01 |
|                                                                  | negative regulation of cell cycle G2/M phase transition (GO:1902750)                               | 1,54E-03 | 1,28E-01 |
|                                                                  | negative regulation of G2/M transition of mitotic cell cycle (GO:0010972)                          | 2,35E-03 | 1,61E-01 |
|                                                                  | positive regulation of cellular catabolic process (GO:0031331)                                     | 2,47E-03 | 1,61E-01 |
|                                                                  | positive regulation of G protein-coupled receptor signaling pathway (GO:0045745)                   | 2,59E-03 | 1,61E-01 |
|                                                                  | positive regulation of transferase activity (GO:0051347)                                           | 2,95E-03 | 1,61E-01 |
|                                                                  | NIK/NF-kappaB signaling (GO:0038061)                                                               | 3,26E-03 | 1,61E-01 |
|                                                                  | regulation of canonical Wnt signaling pathway (GO:0060828)                                         | 3,46E-03 | 1,61E-01 |
|                                                                  | positive regulation of phosphorylation (GO:0042327)                                                | 3,46E-03 | 1,61E-01 |
|                                                                  | positive regulation of transcription initiation from RNA polymerase II promoter (GO:0060261)       | 3,79E-03 | 1,61E-01 |
|                                                                  | regulation of cellular response to heat (GO:1900034)                                               | 3,92E-03 | 1,61E-01 |
|                                                                  | axon extension (GO:0048675)                                                                        | 4,12E-03 | 1,61E-01 |
|                                                                  | regulation of monooxygenase activity (GO:0032768)                                                  | 4,12E-03 | 1,61E-01 |
|                                                                  | regulation of protein phosphorylation (GO:0001932)                                                 | 4,28E-03 | 1,61E-01 |
|                                                                  | regulation of G protein-coupled receptor signaling pathway (GO:0008277)                            | 4,35E-03 | 1,61E-01 |
| ribosomal large subunit assembly (GO:0000027)                    | 4,47E-03                                                                                           | 1,61E-01 |          |
| GO terms, up-regulated in aged cardiac FB upon senolytics        | regulation of feeding behavior (GO:0060259)                                                        | 6,58E+11 | 2,74E-01 |
|                                                                  | positive regulation of developmental growth (GO:0048639)                                           | 1,06E-03 | 2,74E-01 |
|                                                                  | small GTPase mediated signal transduction (GO:0007264)                                             | 1,07E-03 | 2,74E-01 |
|                                                                  | regulation of dephosphorylation (GO:0035303)                                                       | 1,32E-03 | 2,74E-01 |
|                                                                  | keratan sulfate metabolic process (GO:0042339)                                                     | 1,42E-03 | 2,74E-01 |
|                                                                  | extracellular structure organization (GO:0043062)                                                  | 1,59E-03 | 2,74E-01 |
|                                                                  | external encapsulating structure organization (GO:0045229)                                         | 1,64E-03 | 2,74E-01 |
|                                                                  | respiratory system development (GO:0060541)                                                        | 1,78E-03 | 2,74E-01 |
|                                                                  | positive regulation of feeding behavior (GO:2000253)                                               | 2,16E-03 | 2,74E-01 |
|                                                                  | collagen fibril organization (GO:0030199)                                                          | 2,18E-03 | 2,74E-01 |



|                                                             |                                                                                  |          |          |
|-------------------------------------------------------------|----------------------------------------------------------------------------------|----------|----------|
|                                                             | negative regulation of transcription, DNA-templated (GO:0045892)                 | 2,21E-03 | 2,74E-01 |
|                                                             | regulation of axon extension (GO:0030516)                                        | 2,42E-03 | 2,74E-01 |
|                                                             | regulation of cellular catabolic process (GO:0031329)                            | 2,87E-03 | 2,74E-01 |
|                                                             | epithelial tube branching involved in lung morphogenesis (GO:0060441)            | 3,21E-03 | 2,74E-01 |
|                                                             | cyclic purine nucleotide metabolic process (GO:0052652)                          | 3,60E-03 | 2,74E-01 |
|                                                             | positive regulation of axonogenesis (GO:0050772)                                 | 3,82E-03 | 2,74E-01 |
|                                                             | cellular response to osmotic stress (GO:0071470)                                 | 4,13E-03 | 2,74E-01 |
|                                                             | regulation of membrane protein ectodomain proteolysis (GO:0051043)               | 4,13E-03 | 2,74E-01 |
|                                                             | positive regulation of axon extension (GO:0045773)                               | 4,13E-03 | 2,74E-01 |
|                                                             | negative regulation of nucleic acid-templated transcription (GO:1903507)         | 4,43E-03 | 2,74E-01 |
|                                                             | regulation of aldosterone biosynthetic process (GO:0032347)                      | 4,45E-03 | 2,74E-01 |
|                                                             | Cdc42 protein signal transduction (GO:0032488)                                   | 4,45E-03 | 2,74E-01 |
|                                                             | chemical homeostasis within a tissue (GO:0048875)                                | 4,45E-03 | 2,74E-01 |
|                                                             | endothelial cell morphogenesis (GO:0001886)                                      | 4,45E-03 | 2,74E-01 |
|                                                             | glandular epithelial cell development (GO:0002068)                               | 4,45E-03 | 2,74E-01 |
| GO terms, down-regulated in aged cardiac FB upon senolytics | ribosome biogenesis (GO:0042254)                                                 | 1,11E+04 | 8,60E+05 |
|                                                             | rRNA metabolic process (GO:0016072)                                              | 1,26E+04 | 8,60E+05 |
|                                                             | ncRNA processing (GO:0034470)                                                    | 2,25E+04 | 1,02E+07 |
|                                                             | rRNA processing (GO:0006364)                                                     | 3,29E+04 | 1,12E+07 |
|                                                             | nuclear-transcribed mRNA catabolic process, nonsense-mediated decay (GO:0000184) | 4,84E+04 | 1,32E+08 |
|                                                             | cytoplasmic translation (GO:0002181)                                             | 9,76E+04 | 2,22E+08 |
|                                                             | cellular macromolecule biosynthetic process (GO:0034645)                         | 2,05E+05 | 4,00E+07 |
|                                                             | SRP-dependent cotranslational protein targeting to membrane (GO:0006614)         | 1,34E+07 | 2,28E+09 |
|                                                             | cotranslational protein targeting to membrane (GO:0006613)                       | 2,06E+07 | 3,12E+09 |
|                                                             | peptide biosynthetic process (GO:0043043)                                        | 3,23E+06 | 4,40E+09 |
|                                                             | protein targeting to ER (GO:0045047)                                             | 5,07E+06 | 6,29E+08 |
|                                                             | nuclear-transcribed mRNA catabolic process (GO:0000956)                          | 5,96E+06 | 6,78E+08 |
|                                                             | gene expression (GO:0010467)                                                     | 4,61E+08 | 4,84E+10 |
|                                                             | cellular protein metabolic process (GO:0044267)                                  | 5,47E+08 | 5,33E+10 |
|                                                             | translation (GO:0006412)                                                         | 6,18E+08 | 5,62E+10 |
|                                                             | ribosomal large subunit assembly (GO:0000027)                                    | 1,01E+09 | 8,62E+09 |
|                                                             | ribosome assembly (GO:0042255)                                                   | 1,87E+10 | 1,50E+12 |
|                                                             | ribosomal large subunit biogenesis (GO:0042273)                                  | 4,10E+09 | 3,11E+10 |
|                                                             | regulation of inflammatory response (GO:0050727)                                 | 2,46E+10 | 1,77E-03 |
|                                                             | positive regulation of inflammatory response (GO:0050729)                        | 5,40E+10 | 3,68E-03 |
| regulation of translation (GO:0006417)                      | 5,76E+10                                                                         | 3,74E-03 |          |
| ribonucleoprotein complex assembly (GO:0022618)             | 7,24E+10                                                                         | 4,49E-03 |          |
| response to cytokine (GO:0034097)                           | 1,34E+12                                                                         | 7,93E-03 |          |

|                                                                 |                                                                                                               |          |          |
|-----------------------------------------------------------------|---------------------------------------------------------------------------------------------------------------|----------|----------|
|                                                                 | positive regulation of cysteine-type endopeptidase activity involved in apoptotic process (GO:0043280)        | 2,69E+12 | 1,53E-02 |
|                                                                 | activation of cysteine-type endopeptidase activity involved in apoptotic process (GO:0006919)                 | 3,49E+12 | 1,83E-02 |
| GO terms, up-regulated in aged cardiac PC upon senolytics       | muscle contraction (GO:0006936)                                                                               | 3,79E+06 | 9,56E+09 |
|                                                                 | regulation of release of sequestered calcium ion into cytosol by sarcoplasmic reticulum (GO:0010880)          | 1,63E+08 | 2,06E+12 |
|                                                                 | regulation of heart contraction (GO:0008016)                                                                  | 4,79E+08 | 4,03E+11 |
|                                                                 | heart contraction (GO:0060047)                                                                                | 2,14E+10 | 1,35E-03 |
|                                                                 | regulation of cardiac muscle contraction by regulation of the release of sequestered calcium ion (GO:0010881) | 5,57E+10 | 2,34E-03 |
|                                                                 | membrane depolarization during cardiac muscle cell action potential (GO:0086012)                              | 5,57E+10 | 2,34E-03 |
|                                                                 | regulation of heart rate by cardiac conduction (GO:0086091)                                                   | 1,36E+11 | 4,90E-03 |
|                                                                 | cardiac muscle cell action potential (GO:0086001)                                                             | 1,94E+11 | 6,11E-03 |
|                                                                 | regulation of cardiac muscle contraction by calcium ion signaling (GO:0010882)                                | 2,21E+11 | 6,20E-03 |
|                                                                 | protein maturation (GO:0051604)                                                                               | 2,47E+11 | 6,22E-03 |
|                                                                 | regulation of cardiac conduction (GO:1903779)                                                                 | 2,71E+11 | 6,22E-03 |
|                                                                 | cardiac muscle contraction (GO:0060048)                                                                       | 4,63E+10 | 9,18E-03 |
|                                                                 | canonical glycolysis (GO:0061621)                                                                             | 5,09E+10 | 9,18E-03 |
|                                                                 | glucose catabolic process to pyruvate (GO:0061718)                                                            | 5,09E+10 | 9,18E-03 |
|                                                                 | glycolytic process through glucose-6-phosphate (GO:0061620)                                                   | 6,54E+10 | 1,10E-02 |
|                                                                 | striated muscle contraction (GO:0006941)                                                                      | 1,57E+12 | 2,47E-02 |
|                                                                 | cell junction assembly (GO:0034329)                                                                           | 1,87E+11 | 2,64E-02 |
|                                                                 | aerobic electron transport chain (GO:0019646)                                                                 | 1,88E+12 | 2,64E-02 |
|                                                                 | mitochondrial ATP synthesis coupled electron transport (GO:0042775)                                           | 2,10E+12 | 2,74E-02 |
|                                                                 | cardiac muscle cell proliferation (GO:0060038)                                                                | 2,35E+11 | 2,74E-02 |
| striated muscle cell proliferation (GO:0014855)                 | 2,35E+11                                                                                                      | 2,74E-02 |          |
| mitochondrial respiratory chain complex I assembly (GO:0032981) | 2,61E+11                                                                                                      | 2,74E-02 |          |
| muscle organ development (GO:0007517)                           | 2,61E+11                                                                                                      | 2,74E-02 |          |
| NADH dehydrogenase complex assembly (GO:0010257)                | 2,61E+11                                                                                                      | 2,74E-02 |          |
| mitochondrial respiratory chain complex assembly (GO:0033108)   | 2,85E+11                                                                                                      | 2,88E-02 |          |
| GO terms, down-regulated in aged cardiac PC upon senolytics     | gene expression (GO:0010467)                                                                                  | 9,01E+09 | 1,15E-02 |
|                                                                 | nuclear-transcribed mRNA catabolic process, nonsense-mediated decay (GO:0000184)                              | 4,41E+10 | 2,03E-02 |
|                                                                 | ncRNA processing (GO:0034470)                                                                                 | 4,75E+09 | 2,03E-02 |
|                                                                 | peptide biosynthetic process (GO:0043043)                                                                     | 6,36E+10 | 2,04E-02 |
|                                                                 | nuclear-transcribed mRNA catabolic process (GO:0000956)                                                       | 9,29E+10 | 2,13E-02 |
|                                                                 | SRP-dependent cotranslational protein targeting to membrane (GO:0006614)                                      | 1,05E+11 | 2,13E-02 |
|                                                                 | cytoplasmic translation (GO:0002181)                                                                          | 1,25E+12 | 2,13E-02 |
|                                                                 | cotranslational protein targeting to membrane (GO:0006613)                                                    | 1,33E+12 | 2,13E-02 |

|                                                                       |          |          |
|-----------------------------------------------------------------------|----------|----------|
| DNA replication-independent nucleosome organization (GO:0034724)      | 1,51E+11 | 2,15E-02 |
| cellular protein metabolic process (GO:0044267)                       | 1,95E+12 | 2,50E-02 |
| protein targeting to ER (GO:0045047)                                  | 2,20E+11 | 2,56E-02 |
| cellular macromolecule biosynthetic process (GO:0034645)              | 3,03E+11 | 3,23E-02 |
| regulation of RNA splicing (GO:0043484)                               | 4,26E+11 | 3,92E-02 |
| translation (GO:0006412)                                              | 4,28E+10 | 3,92E-02 |
| toll-like receptor 2 signaling pathway (GO:0034134)                   | 6,74E+10 | 5,75E-02 |
| ribosome assembly (GO:0042255)                                        | 7,83E+11 | 6,26E-02 |
| regulation of mRNA splicing, via spliceosome (GO:0048024)             | 9,23E+11 | 6,95E-02 |
| regulation of alternative mRNA splicing, via spliceosome (GO:0000381) | 1,05E-03 | 7,45E-02 |
| clathrin-dependent endocytosis (GO:0072583)                           | 1,27E-03 | 8,53E-02 |
| nucleosome assembly (GO:0006334)                                      | 1,37E-03 | 8,53E-02 |
| amino sugar catabolic process (GO:0046348)                            | 1,40E-03 | 8,53E-02 |
| proteoglycan biosynthetic process (GO:0030166)                        | 2,13E-03 | 1,24E-01 |
| rRNA metabolic process (GO:0016072)                                   | 2,35E-03 | 1,31E-01 |
| sterol metabolic process (GO:0016125)                                 | 2,74E-03 | 1,35E-01 |
| ESCRT complex disassembly (GO:1904896)                                | 2,95E-03 | 1,35E-01 |
